# Supplementary material for: T-cell receptor (TCR) signaling promotes the assembly of RanBP2/RanGAP1-SUMO1/Ubc9 nuclear pore subcomplex via PKC-θ-mediated phosphorylation of RanGAP1
Source: eLife journal article supplement (doi:10.7554/elife.67123), 2021-06-10

# Figure 1

## Figure 1A

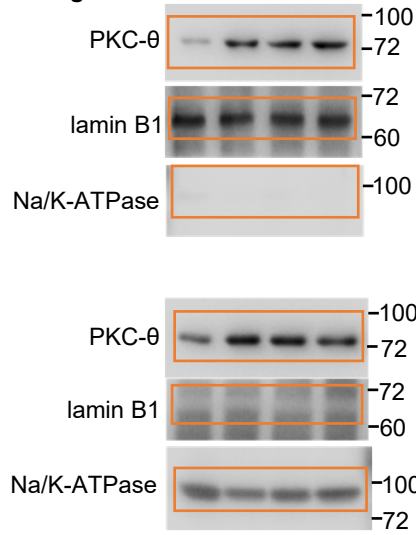

## Figure 1B

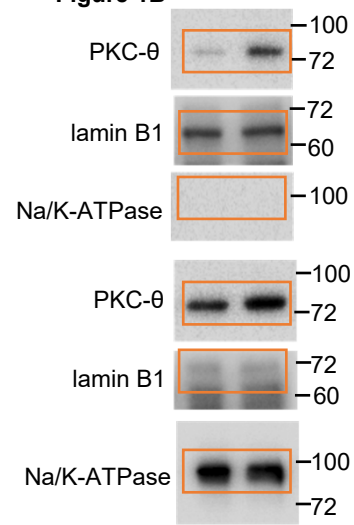

## Figure 1E

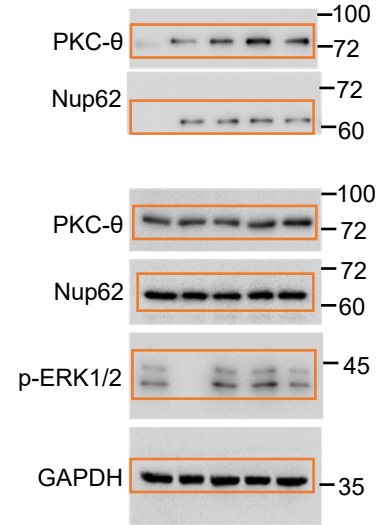

## Figure 1F

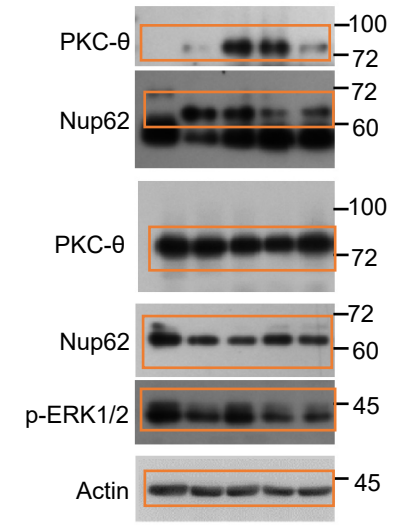

## Figure 1H

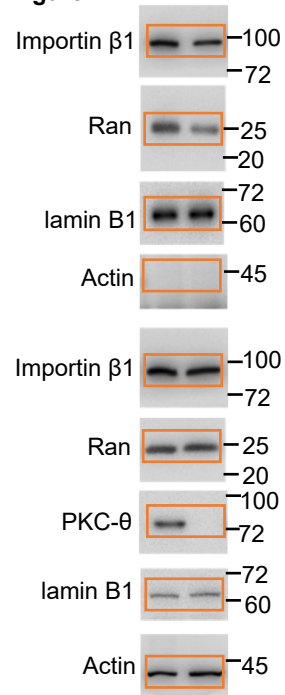

## Figure 1I

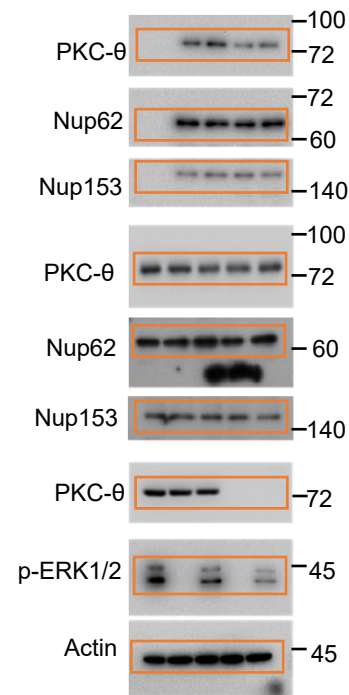

## Figure 1K

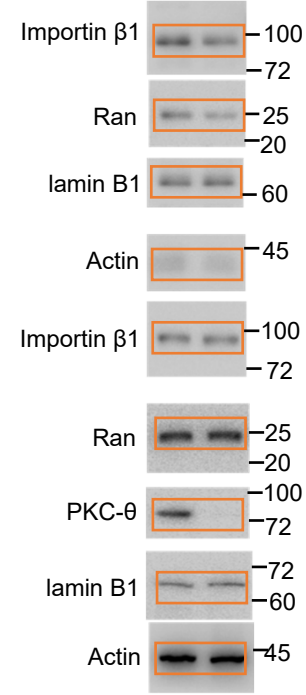

## Figure 1L

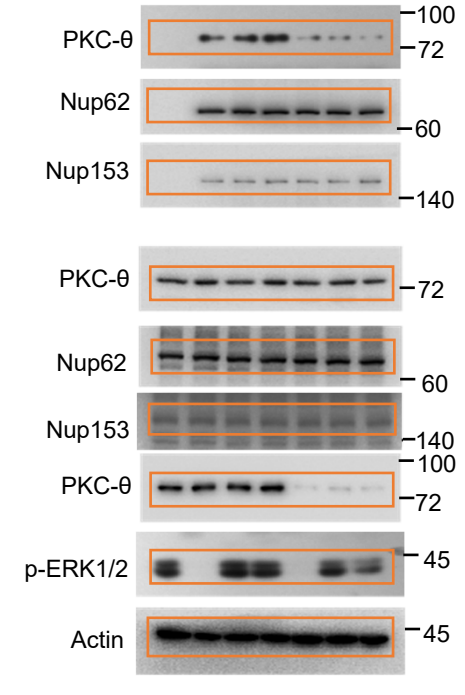

Supplement: fig1-data1 [file elife-67123-fig1-data1-v2.pdf]
