# Supplementary material for: T-cell receptor (TCR) signaling promotes the assembly of RanBP2/RanGAP1-SUMO1/Ubc9 nuclear pore subcomplex via PKC-θ-mediated phosphorylation of RanGAP1
Source: eLife journal article supplement (doi:10.7554/elife.67123), 2021-06-10

# Figure 3-figure supplement 1

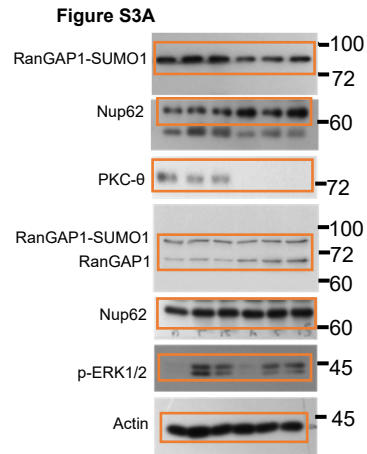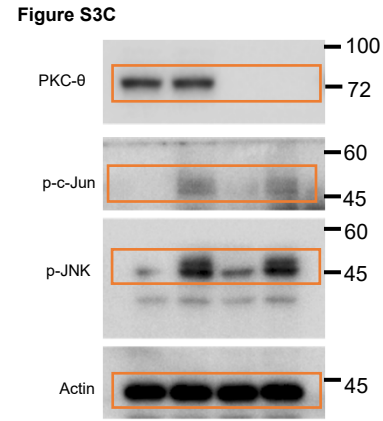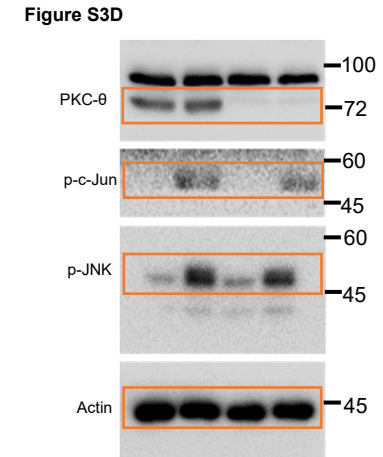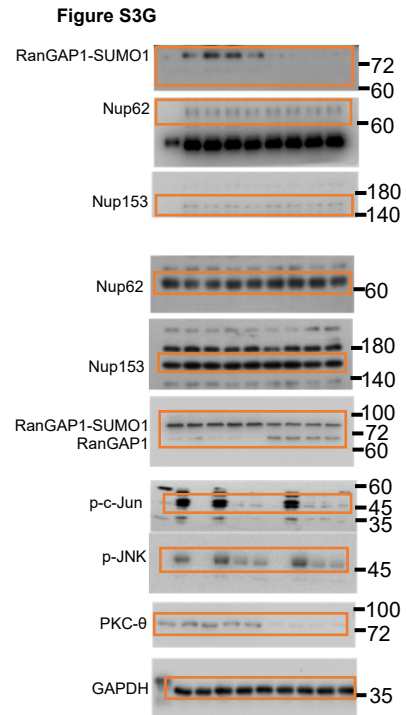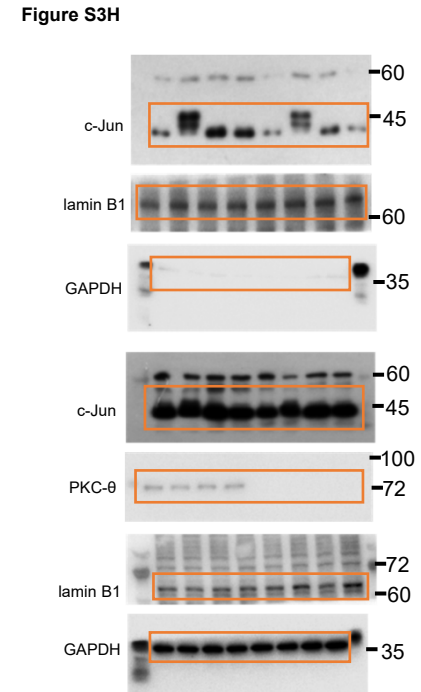

Supplement: fig3-figsupp1-data1 [file elife-67123-fig3-figsupp1-data1-v3.pdf]
