# Supplementary material for: T-cell receptor (TCR) signaling promotes the assembly of RanBP2/RanGAP1-SUMO1/Ubc9 nuclear pore subcomplex via PKC-θ-mediated phosphorylation of RanGAP1
Source: eLife journal article supplement (doi:10.7554/elife.67123), 2021-06-10

# Figure 5

## Figure 5A

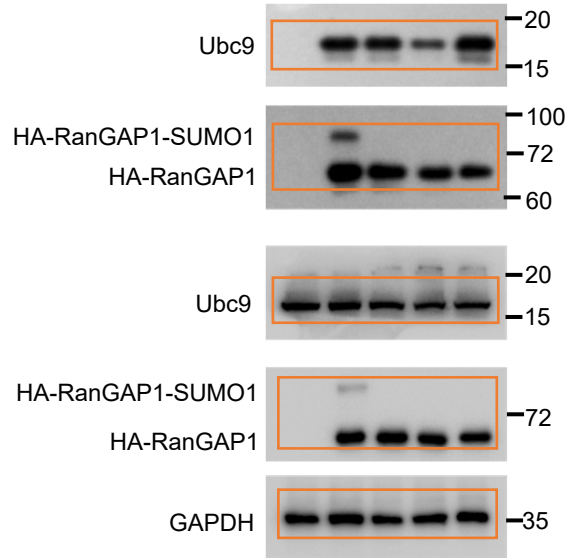

## Figure 5B

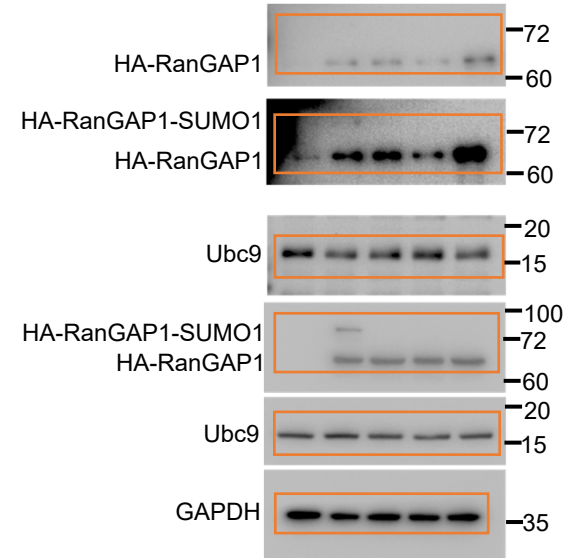

## Figure 5C

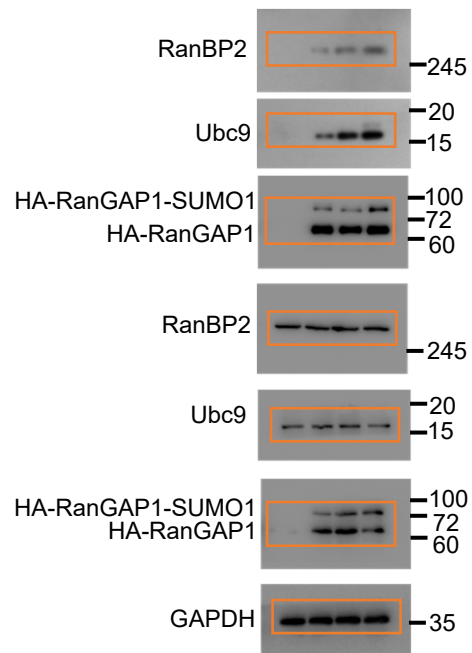

## Figure 5D

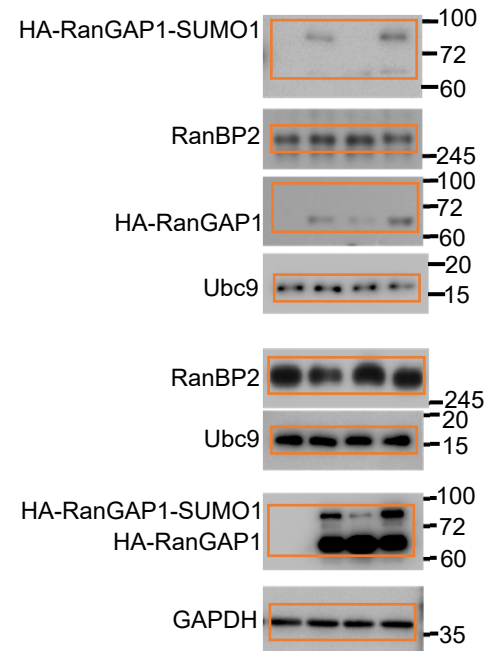

Supplement: fig5-data1 [file elife-67123-fig5-data1-v2.pdf]
