# Supplementary material for: T-cell receptor (TCR) signaling promotes the assembly of RanBP2/RanGAP1-SUMO1/Ubc9 nuclear pore subcomplex via PKC-θ-mediated phosphorylation of RanGAP1
Source: eLife journal article supplement (doi:10.7554/elife.67123), 2021-06-10

**Figure 6A**

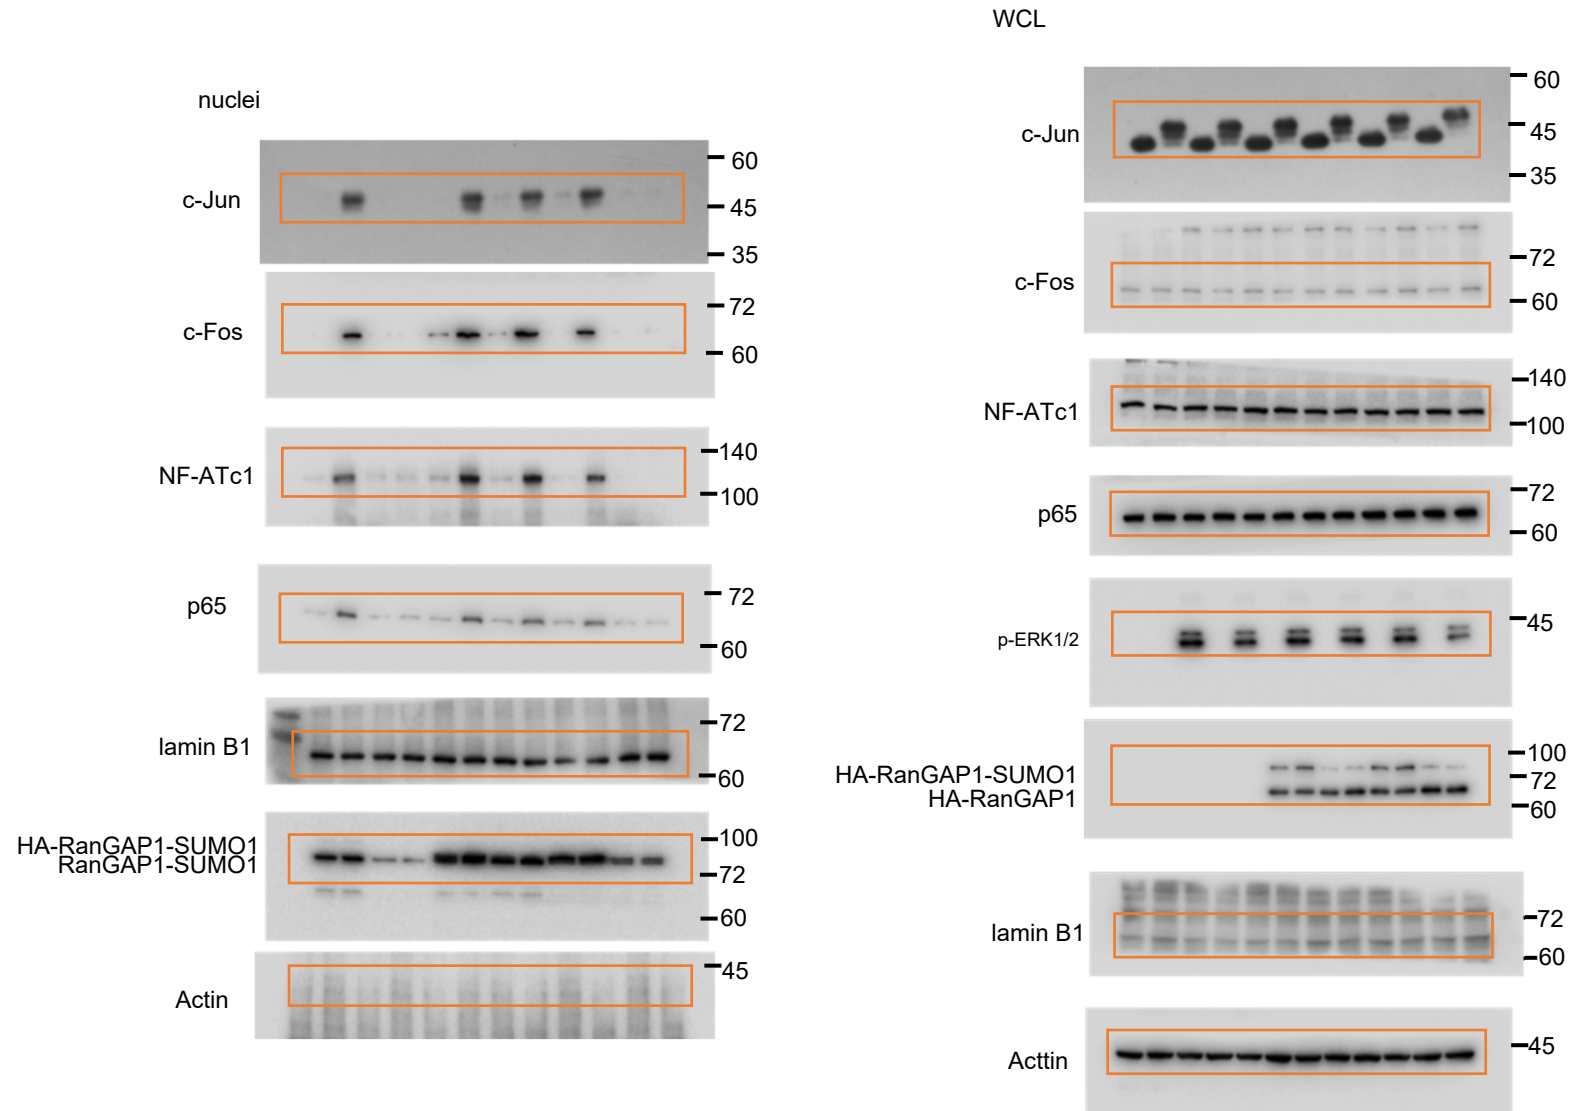

Supplement: fig6-data1 [file elife-67123-fig6-data1-v2.pdf]
