# Supplementary material for: T-cell receptor (TCR) signaling promotes the assembly of RanBP2/RanGAP1-SUMO1/Ubc9 nuclear pore subcomplex via PKC-θ-mediated phosphorylation of RanGAP1
Source: eLife. 2021 Jun 10;10:e67123. doi: 10.7554/eLife.67123 (PMC8225385; doi:10.7554/eLife.67123)
Supplement: Figure 1—source data 2. [file elife-67123-fig1-data2.xlsx]

## Sheet: Row data for Figure 1
Figure 1 D
Pearson ' correlation coefficient
PKC-θ θ colocalization with NPCs
	US	CD3/CD28	PMA/Iono
	0.009	0.437	0.296
	0.052	0.298	0.342
	0.079	0.361	0.354
	0.019	0.35	0.479
	0.025	0.324	0.489
	0.03	0.359	0.45
	0.143	0.402	0.38
	0.214	0.423	0.498
	0.179	0.276	0.591
	0.067	0.337	0.507
	-0.004	0.339	0.541
	0.134	0.313	0.507
	-0.026	0.343	0.478
	0.073	0.362	0.343
	0.061	0.355	0.421
	-0.005	0.456	0.466
	0.175	0.485	0.379
	-0.063	0.33	0.331
	0.051	0.268	0.434
	-0.014	0.68	0.538

## Sheet: Row data figure supplement 1
Figure1─figure supplement 1 B
Particles 100nm or less from the NE/PM (%)
CD3/CD28 times	0 min			5min			10min
%	NE/total	PM/total		NE/total	PM/total		NE/total	PM/total
	NE	PM		NE	PM		NE	PM
1	9.09091	11.1818		13.0435	11.7391		18.75	11.25
2	0	11.1111		23.5294	23.5294		14.2857	28.5714
3	9.52381	14.2857		9.09091	17.2727		18.5714	43.3333
4	0	14.2857		15	17		21.0526	26.3158
5	20	10		20	10		30.7692	38.4615
6	0	0		23.5294	23.5294		32.4324	29.7297
7	18.1818	13.1818		16.6667	19.7778		31.0345	31.0345
8	8.33333	8.33333		18.1818	27.2727		23.5294	39.4118
9	5.26316	5.26316		10.5263	26.3158		25	37.5
10	5	15		27.2727	36.3636		11.4286	35.7143
Figure1─figure supplement 1 F					Figure1─figure supplement 1G
PKC-θ to lamin B1 in NE					importinβ1 N/C			Ran N/C
	ratio				ratio			ratio
	US	PMA/Iono			WT	Prkcq-/-		WT	Prkcq-/-
1	0.1775	0.419			0.70229	0.161972		0.736842	0.357143
2	0.1875	0.4068			0.278195	0.145098		0.683258	0.347826
3	0.1633	0.3572			0.359551	0.0848214		0.556604	0.236994
4	0.1542	0.5122			0.309859	0.290076		0.457249	0.278607
5	0.1829	0.4638			0.522876	0.330709		0.484	0.304813
6	0.1416	0.3841			0.236051	0.148148		0.371134	0.307692
7	0.1513	0.3738			0.445545	0.338983		0.476852	0.284884
8	0.1701	0.3512			0.618056	0.125749		0.696078	0.291667
9	0.1734	0.4123			0.47032	0.236364		0.335938	0.279279
10	0.1482	0.5839			0.597938	0.321168		0.722772	0.147368
11	0.27	0.5151			0.5	0.12		0.768293	0.294798
12	0.1473	0.4442			0.2	0.308511		0.289256	0.320755
13	0.2077	0.501			0.701754	0.0947867		0.424242	0.167464
14	0.1912	0.2566			0.425926	0.166667		0.344828	0.255708
15	0.2104	0.5873			0.381679	0.257812		0.378151	0.556818
16	0.2743	0.4673			0.375	0.11		0.453488	0.515464
17	0.2321	0.6835			0.577236	0.277778		0.589286	0.317073
18	0.1863	0.7669			0.54902	0.272727		0.406015	0.217143
19	0.2444	0.6965			0.405405	0.0869565		0.387234	0.2
20	0.0183	0.433			0.257732	0.194805		0.331683	0.253731
21	0.139	0.3378			0.615385	0.229167		0.438016	0.275229
22	0.1523	0.3223			0.50289	0.135338		0.3	0.282895
23	0.1746	0.722			0.69898	0.232558		0.414815	0.463768
24	0.1953	0.5691			0.711538	0.563636		0.31875	0.355769
25	0.0811	0.4322			0.439613	0.474359		0.361345	0.213115
26	0.2378	0.6797			0.330709	0.385321		0.495327	0.253623
27	0.1534	0.3911			0.579345	0.247391		0.512889	0.213986
28	0.1845	0.5665			0.835466	0.371456		0.537926	0.321566
29	0.2654	0.7136			0.518532	0.291786		0.31458	0.276443
30	0.1608	0.5369			0.475622	0.328769		0.396725	0.379843
Figure1─figure supplement 1 H
	importinβ1 /lamin B1(nuclear extract)					Ran/lamin B1 (nuclear extract)
repeat	WT	Prkcq-/-			repeat	WT	Prkcq-/-
1	0.502267	0.138043			1	0.462	0.38
2	0.670385	0.334183			2	0.733	0.366
3	0.41254	0.209137			3	0.768	0.396
Figure1─figure supplement 1 I
	importinβ1 /Nup62(IP)
		WT		Prkcq-/-
repeat	CD3/CD28	-	+	-	+
1		0.808007	1.80373	0.207532	0.205977
2		0.400371	0.892542	0.161415	0.190364
3		0.599828	1.30035	0.3085	0.311865
Figure1─figure supplement 1J
	importinβ1 N/C			Ran N/C
	NC	siPKC-θ		NC	siPKC-θ
1	0.51634	0.346154		0.916667	0.498182
2	0.479339	0.23913		0.810811	0.6375
3	0.307692	0.345454		0.607843	0.621622
4	0.357143	0.347826		0.754717	0.558442
5	0.481482	0.254902		0.903226	0.55
6	0.301625	0.279412		1.33333	0.578947
7	0.393939	0.381818		0.866667	0.627907
8	0.387097	0.288889		0.604651	0.933333
9	0.423077	0.290323		0.606061	0.566667
10	0.387097	0.289474		0.888889	0.476191
11	0.28125	0.23913		0.857143	0.631579
12	0.416667	0.194444		0.820513	0.642857
13	0.262295	0.257143		1.15385	0.383562
14	0.233333	0.30303		0.660377	0.578947
15	0.482759	0.466667		0.896333	0.37037
16	0.324324	0.23913		0.833333	0.580645
17	0.259259	0.289474		0.722222	0.195266
18	0.26087	0.217391		1.20833	0.545455
19	0.285714	0.136364		1.0625	0.501625
20	0.25	0.16		0.921053	0.193548
21	0.305556	0.285714		0.621622	0.500125
22	0.321429	0.153846		1.11429	0.238095
23	0.473684	0.178571		1.17647	0.322581
24	0.606061	0.148148		0.732143	0.228571
25	0.304348	0.555556		0.947368	0.394737
26	0.34	0.243902		0.803922	0.357143
27	0.378934	0.125674		0.925673	0.412975
28	0.246579	0.158324		1.32746	0.372895
29	0.237856	0.23749		1.15839	0.519322
30	0.315436	0.214539		0.873918	0.297438
Figure1─figure supplement 1 K
	importinβ1 /lamin B1(nuclear extract)					Ran/lamin B1 (nuclear extract)
repeat	NC	siPKC-θ			repeat	NC	siPKC-θ
1	0.817742	0.487368			1	0.575494	0.259823
2	1.00861	0.638174			2	0.738681	0.245197
3	0.74936	0.389608			3	0.401142	0.108185
Figure1─figure supplement 1 L
	importinβ1 /Nup62(IP)
	NC			shPKC-θ
CD3/CD28	0 min	5 min	15 min	0 min	5 min	15 min
1	0.503	0.598	2.001	0.17	0.18	0.181
2	0.403	0.801	0.997	0.162	0.151	0.18
3	0.898	1.098	1.501	0.211	0.291	0.269
