# Supplementary material for: T-cell receptor (TCR) signaling promotes the assembly of RanBP2/RanGAP1-SUMO1/Ubc9 nuclear pore subcomplex via PKC-θ-mediated phosphorylation of RanGAP1
Source: eLife. 2021 Jun 10;10:e67123. doi: 10.7554/eLife.67123 (PMC8225385; doi:10.7554/eLife.67123)
Supplement: Figure 2—figure supplement 1—source data 2. [file elife-67123-fig2-figsupp1-data2.xlsx]

## Sheet: Sheet1
Figure 2─figure supplement 1 C
Pearson ' correlation coefficient
PKC-θ colocalization with RanGAP1
US	CD3/CD28	PMA/Iono
0.201	0.385	0.598
0.219	0.332	0.354
0.192	0.308	0.414
0.216	0.305	0.377
0.259	0.285	0.484
0.232	0.25	0.419
0.122	0.363	0.411
0.159	0.27	0.375
0.148	0.384	0.397
0.265	0.381	0.254
0.086	0.312	0.258
0.055	0.428	0.358
0.026	0.418	0.46
0.002	0.399	0.388
0.317	0.332	0.452
0.084	0.394	0.46
0.245	0.274	0.453
0.153	0.332	0.396
0.299	0.338	0.396
0.083	0.285	0.353
Figure 2─figure supplement 1 E
total RanGAP1/ cMyc-PKC-θ (IP)
Repeat	cMyc-PKC-θ	cMyc-PKC-θ-K325/526R	cMyc-PKC-θ-K409R	cMyc-PKC-θ-A148E
1	1.92452	0.239165	0.29648	3.64196
2	2.89109	0.166449	0.35065	4.70954
3	3.32798	0.586859	0.308341	5.6845
Figure 2─figure supplement 1 G
cMyc-PKC-θ/lamin B1 (nuclear extract)
repeat	US				PMA/Iono
	cMyc-PKC-θ	cMyc-PKC-θ-K325/526R	cMyc-PKC-θ-K409R	cMyc-PKC-θ-A148E	cMyc-PKC-θ	cMyc-PKC-θ-K325/526R	cMyc-PKC-θ-K409R	cMyc-PKC-θ-A148E
1	0.439	0.138	0.1815	1.184	0.618	0.196	0.289	1.506
2	0.563	0.153	0.183	0.747	0.876	0.174	0.252	1.455
3	0.416	0.203	0.123	1.13	0.576	0.23	0.203	1.729
Figure 2─figure supplement 1 H
sumoylated cMyc-PKC-θ/cMyc-PKC-θ (IP)
repeat	cMyc-PKC-θ	cMyc-PKC-θ-K325/526R	cMyc-PKC-θ-K409R	cMyc-PKC-θ-A148E
1	5.49016	0.936567	1.50218	8.65117
2	3.68345	1.27048	0.964003	10.181
3	2.63524	0.822418	1.63642	9.55145
