# Supplementary material for: T-cell receptor (TCR) signaling promotes the assembly of RanBP2/RanGAP1-SUMO1/Ubc9 nuclear pore subcomplex via PKC-θ-mediated phosphorylation of RanGAP1
Source: eLife. 2021 Jun 10;10:e67123. doi: 10.7554/eLife.67123 (PMC8225385; doi:10.7554/eLife.67123)
Supplement: Figure 3—source data 2. [file elife-67123-fig3-data2.xlsx]

## Sheet: Row data for Figure 3
Figure 3 A
RanGAP1 in NE/total RanGAP1
	fluorescence intensity
	WT			Prkcq-/-
	RanGAP1 in NE	total RanGAP1	ratio	RanGAP1 in NE	total RanGAP1	ratio
1	2164.05	3996.67	0.541463	1407.89	3860.34	0.364706
2	1205.43	2781.76	0.433333	1347.34	3734.19	0.360811
3	2341.68	4473.95	0.523404	1256.5	2926.8	0.42931
4	1109.3	3128.81	0.354545	1226.23	1816.63	0.675
5	1249.36	2677.19	0.466667	1634.97	4112.65	0.397546
6	1833.86	2983.67	0.614634	1650.11	3153.88	0.5232
7	1132.14	1838.52	0.615789	1286.78	2624.02	0.490385
8	1277.28	2273.95	0.561702	1226.23	3532.34	0.347143
9	1663.23	3548.22	0.46875	1150.53	2548.33	0.451485
10	4586.61	5902.6	0.777049	878.041	2649.26	0.331429
11	1654.66	2854.54	0.579661	772.069	2296.02	0.336264
12	1617.94	2451.43	0.66	1059.7	2775.41	0.381818
13	2149.13	3080.43	0.697674	1271.64	3280.03	0.387692
14	1907.69	3709.39	0.514286	1468.44	2245.56	0.653933
15	2945.41	4548.07	0.647619	1892.32	4339.73	0.436046
16	1828.84	2806.16	0.651724	1271.64	2649.26	0.48
17	1743.69	2906.16	0.6	1537.92	3561.27	0.431847
18	2554.57	3822.18	0.668354	809.161	1815.42	0.445714
19	1820	3393.21	0.536364	1120.26	3784.65	0.296
20	2288.95	5263.64	0.434862	3103.41	5979.75	0.518987
21	1720.05	2548.23	0.675	1485.52	3945.28	0.376531
22	2597.28	3935.28	0.66	1362.47	3280.03	0.415385
23	1306.32	1741.76	0.75	1165.67	4213.58	0.276647
24	1683.7	4257.62	0.395455	1816.63	5222.82	0.347826
25	1045.05	2322.34	0.45	1937.74	4743.43	0.408511
26	3559.32	4661.01	0.763636	2010.03	4265.89	0.471187
27	2670.69	3918.95	0.681481	726.653	1993.25	0.364557
28	3275.07	5815.55	0.563158	1503.51	3138.64	0.479032
29	1145.44	1751.44	0.654	1273.48	2748.33	0.463366
30	1752.5	4406	0.397753	736.584	1483.4	0.496552
Figure 3 B
RanGAP1 in NE/total RanGAP1
	fluorescence intensity
	NC			siPKC-θ
	RanGAP1 in NE	total RanGAP1	ratio	RanGAP1 in NE	total RanGAP1	ratio
1	2298.66	5746.66	0.4	1884.52	3602.43	0.523125
2	3437.72	6757.9	0.508696	365.968	2683.76	0.136364
3	4062.99	4811.43	0.844445	805.147	4066.4	0.198
4	1562.74	3612.8	0.432558	1293.08	3497.02	0.369767
5	1515.39	4366.36	0.347059	1341.88	3009.06	0.445946
6	905.841	2470.47	0.366667	1049.11	3090.39	0.339474
7	2602.35	3571.85	0.728571	1519.38	4927.74	0.308333
8	2241.14	4980.32	0.45	1171.09	2927.74	0.4
9	5229.33	6225.4	0.84	1122.3	3009.06	0.372973
10	1422.96	2898.62	0.490909	1341.88	3497.02	0.383721
11	1732.78	1980.32	0.875	683.138	2195.8	0.311111
12	3504.47	5062.01	0.692308	1851.7	5253.04	0.3525
13	1736.78	4898.62	0.354545	1219.89	3822.32	0.319149
14	4128.68	7180.32	0.575	1827.63	5009.06	0.364865
15	5344.41	6998.62	0.763637	1557.53	3933.15	0.396
16	1414.67	3143.7	0.45	1388.58	4090.39	0.339474
17	1192.13	2980.32	0.4	878.321	2521.11	0.348387
18	1459.39	3162.01	0.461539	1490.29	4683.76	0.318182
19	931.299	2124.02	0.438461	1341.52	3439.79	0.39
20	2197.2	4225.4	0.52	2340.64	6195.8	0.377778
21	3450.92	6470.47	0.533333	2289.08	5765.08	0.397059
22	2764.47	7797.25	0.354545	939.75	2659.67	0.353333
23	3311.22	6307.09	0.525	1537.06	3822.32	0.402128
24	3740.77	4898.62	0.763637	1390.67	2927.74	0.475
25	2487.7	3980.32	0.625	1262.75	2946.41	0.428571
26	904.111	2062.01	0.438461	495.752	1602.43	0.309375
27	3061.58	7143.7	0.428571	889.123	3293.05	0.27
28	4280.25	6940.95	0.616667	785.839	2984.97	0.263265
29	3333.07	6862.21	0.485714	1358.02	4760.89	0.285246
30	3379.45	5450.73	0.62	1564.21	7213.93	0.216832
Figure 3 D
	RanGAP1-SUMO1/Nup62 (IP)							RanGAP1-SUMO1/RanGAP1 (WCL)
	WT		Prkcq-/-					WT		Prkcq-/-
CD3/CD28	-	+	-	+			CD3/CD28	-	+	-	+
1	0.23	0.481	0.029	0.041			1	6.496	10.497	2.942	6.115
2	0.34	0.679	0.119	0.178			2	8.192	12.7156	4.51	5.295
3	0.411	0.721	0.21	0.191			3	8.501	14.406	5.705	5.9
Figure 3 E
	RanGAP1-SUMO1/Nup62 (IP)								RanGAP1-SUMO1/RanGAP1 (WCL)
	NC			siPKC-θ					NC			siPKC-θ
CD3/CD28	0 min	5 min	15 min	0 min	5 min	15 min		CD3/CD28	0 min	5 min	15 min	0 min	5 min	15 min
1	0.501	0.808	1.194	0.262	0.502	0.396		1	3.032	5.441	7.486	0.998	1.113	1.088
2	0.317	0.681	1.314	0.171	0.219	0.172		2	5.128	6.396	7.802	1.176	1.096	0.982
3	0.415	0.349	0.739	0.241	0.129	0.239		3	6.205	7.901	9.079	2.009	2.211	2.203
Figure 3 F
	RanGAP1-SUMO1/Nup62 (IP)							RanGAP1-SUMO1/RanGAP1 (WCL)
	WT		Prkcq-/-					WT		Prkcq-/-
CD3/CD28	-	+	-	+			CD3/CD28	-	+	-	+
1	0.207	0.502	0.142	0.29			1	15.898	20.954	7.012	13.924
2	0.293	0.631	0.171	0.451			2	12.003	17.109	6.702	12.301
3	0.351	0.449	0.186	0.389			3	13.872	18.467	6.811	11.415
Figure 3 G
c-Jun N/C Splenic T cells
	fluorescence intensity
	WT						Prkcq-/-
	US			CD3/CD28			US			CD3/CD28
	nuclear	cytosol	ratio	nuclear	cytosol	ratio	nuclear	cytosol	ratio	nuclear	cytosol	ratio
1	1100.12	2667.79	0.412371	2105.49	1116.48	1.88583	1568.9	2845.15	0.551429	896.241	3151.78	0.28436
2	366.374	1978.42	0.185185	5597.1	2860.05	1.95699	1025.28	3638.09	0.281818	1474.64	3064.97	0.481126
3	1756.23	3527.48	0.497872	2652.51	1062.12	2.49738	757.505	2693.68	0.281216	679.649	2746.02	0.247503
4	2582.26	7459.87	0.346154	4759.63	1852.77	2.56893	1569.03	3620.83	0.433333	1476.34	4817.94	0.306425
5	3343.53	6545.65	0.510803	4014.9	946.43	4.24215	1264.94	4672.66	0.270711	3635.26	2076.52	1.75065
6	463.304	2093.45	0.221311	1298.58	601.425	2.15917	1399.66	5775.26	0.242354	1801.33	3327.48	0.54135
7	741.048	2287.95	0.323891	2805.32	3149.28	0.890783	1790.44	3873.03	0.462284	968.542	4889.96	0.198068
8	738.514	2538.64	0.290909	5003.7	2668.64	1.875	1884.43	5066.24	0.371957	997.456	3725.98	0.267703
9	1044.05	3886.2	0.268657	3541.39	1267.55	2.79389	1139.58	3148	0.362	1445.24	5953.54	0.242754
10	2535.03	5263.2	0.481651	2406.22	1414.08	1.70161	1046.24	5114.43	0.204566	2802.45	4792.48	0.584759
11	1849.15	3862.57	0.478736	2188.96	864.968	2.53069	1936.59	3425.61	0.565327	641.534	3227.51	0.19877
12	1191.47	2887.86	0.412579	3371.99	2376.54	1.41886	628.926	1570.74	0.4004	2266.32	6721.87	0.337156
13	572.971	1804.18	0.317579	4183.83	1911.25	2.18906	441.992	2243.77	0.196986	1283.99	3017.39	0.425532
14	729.193	1897.11	0.38437	5062.08	2191.75	2.30961	902.472	3810.2	0.236857	572.357	2647.15	0.216216
15	1528.85	2656.96	0.575412	1480.67	1070.99	1.38253	1655.95	5374.8	0.308096	1118.72	2803.7	0.399015
16	1736.79	3855.6	0.450458	1008.71	477.495	2.1125	533.744	1590.74	0.335531	783.493	5038.94	0.155488
17	399.226	1817.57	0.219648	2457.19	1541.88	1.59364	1454.4	2708.55	0.536969	1465.55	4419.45	0.331613
18	1591.52	6763.94	0.235294	3187.37	1191.92	2.67416	4349.67	6869.39	0.633196	1228.34	3177.29	0.386598
19	2076.77	5935.32	0.349901	866.018	464.915	1.86275	485.781	2651.3	0.183224	309.544	2068.73	0.14963
20	1067.14	2613.3	0.408349	1749.89	2024.88	0.864198	7177.86	9603.35	0.747433	1487.26	4744.17	0.313492
21	465.006	2014.02	0.230885	6502.47	4460.99	1.45763	2934.02	7586	0.386767	1125.59	3199.05	0.351852
22	1404.84	3666.79	0.383126	2888.85	1136.6	2.54167	2207.07	3674.05	0.600717	1672.06	2736.1	0.611111
23	1207.74	3262.84	0.370149	2215.39	1010.77	2.19178	5686.66	8675.38	0.655494	2620.38	7503.82	0.349206
24	568.074	1417.57	0.400738	3902.68	2075.43	1.88042	897.219	1338.17	0.670481	475.064	3309.34	0.143552
25	493.071	1545.72	0.318991	3781.18	2563.39	1.47507	3149.56	6821.78	0.461692	2663.28	6009.46	0.443182
26	862.625	3675.96	0.234667	1382.37	704.42	1.96243	1243.6	4299.29	0.289256	1734.31	3988.92	0.434783
27	1493	3911.83	0.381663	1676.78	3537.59	0.473988	2456.67	5592.41	0.439286	434.076	5170.38	0.2
28	1095.29	2486.54	0.440486	1591.88	2843.18	0.559896	2393.4	8759.05	0.273249	1491.95	3956.9	0.377049
29	2263.36	3943.52	0.573944	1583.87	1144.88	1.38343	1081.14	3387.21	0.319184	1278.77	2611.57	0.489655
30	1579.46	3133.17	0.50411	1147.12	1166.42	0.983453	507.031	2370.75	0.21387	3257.62	8942.87	0.36427
Figure 3 I
c-Jun N/C Thymocytes
	fluorescence intensity
	WT						Prkcq-/-
	US			CD3/CD28			US			CD3/CD28
	nuclear	cytosol	ratio	nuclear	cytosol	ratio	nuclear	cytosol	ratio	nuclear	cytosol	ratio
1	1096.45	2809.1	0.390323	1054.97	680.439	1.55043	1140.23	4535.57	0.251397	2135.97	1736.57	1.23
2	546.968	3441.43	0.158936	1455.75	886.669	1.64182	631.727	5053.82	0.125	502.037	366.419	1.37012
3	1157.04	2726.35	0.42439	2952.77	1498.7	1.97022	1335.76	4066.21	0.328502	2943.03	2246.41	1.3101
4	615.043	1313.01	0.468421	2019.27	869.5	2.32233	1273.92	3478.78	0.366197	4724.64	3721.58	1.26953
5	966.993	4615.19	0.209524	3659.51	1633.19	2.24071	1242.22	2698.61	0.460317	1357.1	729.572	1.86013
6	1493.65	2695.45	0.554135	3043.36	1512.34	2.01235	1627.16	3698.09	0.44	3221.92	1841.1	1.75
7	1347.05	3159.76	0.426316	4078.53	2531.23	1.61128	745.566	1848.38	0.403361	4331.62	1951.18	2.22
8	1994.78	4412.14	0.452113	2158.44	1130.33	1.90957	1242.75	2663.03	0.466667	5675.15	2728.83	2.0797
9	320.877	1404.55	0.228455	1199.67	685.523	1.75	1231.37	2401.18	0.512821	1305.51	601.576	2.17015
10	1299.37	3810.67	0.340983	4155.31	1946.68	2.13457	1147.61	3901.86	0.294118	929.181	603.459	1.53976
11	1608.38	3194.35	0.503509	3559.1	1449.54	2.45533	1931.21	2602.34	0.742105	3522.59	2039.94	1.7268
12	2030.63	5801.8	0.35	5934.32	2772.99	2.14004	1321.96	2967.67	0.445454	1923.28	1014.87	1.89511
13	2972.34	4820.01	0.616667	3085.43	1786.6	1.72699	1105.63	1909	0.579167	1859.12	973.599	1.90953
14	1027.08	7236.24	0.141935	3267.45	1870.47	1.74686	1607.02	3502.83	0.458779	1956.45	1369.43	1.42866
15	1434.1	5821.58	0.246342	3642.42	1946.68	1.8711	488.306	1916.14	0.254839	1554.58	953.739	1.62999
16	445.551	1582.33	0.28158	959.221	618.64	1.55053	1678.29	2966.53	0.565741	3513.85	2091.73	1.67988
17	2163.23	4434.21	0.48785	2504.06	1480.94	1.69086	517.05	2699.51	0.191534	1494.41	732.515	2.04011
18	1393.08	2821.54	0.493729	824.911	465.737	1.7712	443.067	875.522	0.506061	1541.73	934.322	1.65011
19	438.142	2258.12	0.19403	1675.29	1266.88	1.32237	394.115	1046.28	0.376684	2138.11	1181.28	1.81
20	265.144	977.165	0.27134	613.528	423.873	1.44743	742.448	2274.55	0.326415	3798.17	2375.35	1.59899
21	795.156	3457.2	0.23	1666.87	917.494	1.81677	706.946	3731.11	0.189474	1305.49	763.509	1.70985
22	867.935	1679.44	0.5168	701.073	376.776	1.86072	861.249	2568.64	0.335294	1055.14	593.838	1.77681
23	1529.76	3998.95	0.38254	2102.97	982.009	2.14149	1225.55	1852.96	0.661404	1332.9	690.757	1.92963
24	825.15	2945.94	0.280097	4411.3	2463.75	1.79048	1713.82	4854.84	0.353012	3166.31	1537.04	2.06
25	781.878	4829.24	0.161905	3012.41	1568.91	1.92007	584.26	2794.29	0.209091	1335.41	829.488	1.60992
26	1564.96	4370.16	0.358101	3312.08	1810.62	1.82926	557.539	4415.2	0.126277	1863.67	1433.6	1.3
27	1402.26	5348.37	0.262185	3603.41	1810.62	1.99016	325.07	1676.95	0.193846	1221.16	726.95	1.67984
28	2033.64	3495.32	0.581818	4373.11	2009.47	2.17625	1386.16	4825.88	0.287234	1759.36	862.479	2.03989
29	330.381	2401.38	0.13758	8534.7	3725.9	2.29064	399.827	2654.39	0.150629	2793.86	1683.38	1.65967
30	1025.98	4224.63	0.242857	1769.07	966.326	1.83071	406.327	2008.29	0.202326	3949.62	2037.29	1.93867

## Sheet: Row data figure supplement 1
Figure 3─figure supplement 1 B
	resting
	Splenic T		Jurkat E6.1		Thymocytes
	WT	Prkcq-/-	NC	siPKC-θ	WT	Prkcq-/-
RanGAP1-SUMO1/Nup62 (IP)	0.23	0.029	0.501	0.262	0.207	0.142
	0.34	0.119	0.317	0.171	0.293	0.171
	0.411	0.21	0.415	0.241	0.351	0.186
	resting
	Splenic T		Jurkat E6.1		Thymocytes
	WT	Prkcq-/-	NC	siPKC-θ	WT	Prkcq-/-
RanGAP1-SUMO1/RanGAP1 (WCL)	6.496	2.942	3.032	0.998	15.898	7.012
	8.192	4.51	5.128	1.176	12.003	6.702
	8.501	5.705	6.205	2.009	13.872	6.811
Figure 3─figure supplement 1 E
	Splenic T
	WT		Prkcq-/-
CD3/CD28	-	+	-	+
c-Jun/lamin B1 (nuclear extract)	0.215814	1.97823	0.419213	0.342706
	0.546083	3.63072	0.152087	0.318958
	0.515214	3.23179	0.349636	0.465755
	0.682278	2.17568	0.188145	0.476909
Figure 3─figure supplement 1F
	Thymocytes
	WT		Prkcq-/-
CD3/CD28	-	+	-	+
c-Jun/lamin B1 (nuclear extract)	0.299421	2.26869	0.066317	2.15967
	0.422151	1.75359	0.355987	1.5207
	0.315731	1.39542	0.239944	1.06486
	0.141902	1.5822	0.147081	1.36422
