# Supplementary material for: T-cell receptor (TCR) signaling promotes the assembly of RanBP2/RanGAP1-SUMO1/Ubc9 nuclear pore subcomplex via PKC-θ-mediated phosphorylation of RanGAP1
Source: eLife. 2021 Jun 10;10:e67123. doi: 10.7554/eLife.67123 (PMC8225385; doi:10.7554/eLife.67123)
Supplement: Figure 4—source data 2. [file elife-67123-fig4-data2.xlsx]

## Sheet: Row data for Figure 4
Figure 4 D
HA-RanGAP1	WT	S504A	S506A	S504A/S506A
p-Ser/Thr-RanGAP1/RanGAP1(%)	23.569	16.996	22.015	12.333
	20.124	10.102	14.407	9.878
	20.903	8.788	15.612	4.711
Figure 4 F
HA-RanGAP1	WT	S504A	S506A	S504A/S506A
HA-RanGAP1-SUMO1/HA-RanGAP1(%)	13.7723	20.3879	9.08405	31.3143
	18.4131	21.2518	12.9876	42.2921
	16.4942	27.9278	3.29762	32.1507

## Sheet: Row data figure supplement 1
Figure 4─figure supplement 1C
HA-RanGAP1	WT	S34A	T419A	S478A
p-Ser/Thr-RanGAP1/RanGAP1(%)	24.622	20.139	25.697	20.559
	20.018	15.281	17.998	16.966
	21.019	23.276	19.798	17.465
