# Supplementary material for: T-cell receptor (TCR) signaling promotes the assembly of RanBP2/RanGAP1-SUMO1/Ubc9 nuclear pore subcomplex via PKC-θ-mediated phosphorylation of RanGAP1
Source: eLife. 2021 Jun 10;10:e67123. doi: 10.7554/eLife.67123 (PMC8225385; doi:10.7554/eLife.67123)
Supplement: Figure 5—source data 2. [file elife-67123-fig5-data2.xlsx]

## Sheet: Sheet1
Figure 5 E
	HA-RanGAP1AA	HA-RanGAP1	HA-RanGAP1EE
HA-RanGAP1-SUMO1/HA-RanGAP1(%)	22.346	39.083	47.521
	21.999	46.521	64.528
	13.257	33.846	60.437
