# Supplementary material for: T-cell receptor (TCR) signaling promotes the assembly of RanBP2/RanGAP1-SUMO1/Ubc9 nuclear pore subcomplex via PKC-θ-mediated phosphorylation of RanGAP1
Source: eLife. 2021 Jun 10;10:e67123. doi: 10.7554/eLife.67123 (PMC8225385; doi:10.7554/eLife.67123)
Supplement: Figure 6—source data 2. [file elife-67123-fig6-data2.xlsx]

## Sheet: Row data for Figure 6
Figure 6 C
NF-ATc1 N/C
	fluorescence intensity
	NC						RanGAP1 (KD)
	US			CD3/CD28			US			CD3/CD28
	NF-ATc1 in nuclei	NF-ATc1 in cytoplasmic	ratio	NF-ATc1 in nuclei	NF-ATc1 in cytoplasmic	ratio	NF-ATc1 in nuclei	NF-ATc1 in cytoplasmic	ratio	NF-ATc1 in nuclei	NF-ATc1 in cytoplasmic	ratio
1	1527.67	3180.26	0.48036	2588.45	1821.5	1.42105	1355.47	3080.72	0.439986	1652.94	1849.06	0.893939
2	1961.85	3936.83	0.498333	885.12	597.456	1.48148	1868.62	2669.04	0.700112	1298.68	1558.41	0.833333
3	2264.37	5144.71	0.440136	4343.33	2982.77	1.45614	1716.24	3861.55	0.444444	3461.86	4116.81	0.840909
4	4586.8	4028.94	1.13846	694.929	461.387	1.50617	1540.09	4106.91	0.375	2753.16	4387.84	0.627451
5	1077.56	2965.77	0.363333	2174.37	1133.64	1.91803	766.635	1553.99	0.493333	864.562	1671.49	0.517241
6	956.765	3361.84	0.284596	4693.66	2157.57	2.17544	491.656	1965.67	0.250121	1015.7	2046.72	0.496256
7	727.017	1363.16	0.533333	1202.51	709.479	1.69491	557.76	1338.62	0.416667	703.027	1682.24	0.417911
8	3150.6	5119.73	0.615385	1355.74	698.728	1.9403	955.834	2708.2	0.352941	1283.57	2832.7	0.453125
9	764.275	2544.73	0.300336	4035.17	2824.62	1.42857	246.706	863.471	0.285714	852.042	1511.69	0.563636
10	434.21	1302.63	0.333333	2003.34	1381.62	1.45	1582.17	4746.5	0.333333	671.947	1657.47	0.405405
11	407.861	2272.37	0.179487	3669.28	1568.32	2.33962	390.978	1452.2	0.269231	1076.75	1125.7	0.956522
12	750.815	3756.57	0.199867	747.671	1757.03	0.425532	595.138	2281.36	0.26087	600.365	941.112	0.637931
13	1736.34	4514.47	0.384615	672.753	3924.39	0.171429	730.1	1572.52	0.464286	484.533	814.016	0.595238
14	335.704	2484.21	0.135135	574.364	1963.53	0.292517	2108.34	6325.02	0.333333	1221.53	1603.26	0.761905
15	572.543	4236.82	0.135135	3275.44	1958.15	1.67273	979.409	1762.94	0.555556	1151.39	2756.35	0.417722
16	476.872	1573.68	0.30303	1978.87	1605.66	1.23243	2687.35	6270.49	0.428571	740.258	2290.18	0.323232
17	2241.51	4484.21	0.499867	1551.09	1120.23	1.38461	2206.85	4168.5	0.529412	1747.67	3175.78	0.550312
18	1675.27	3026.3	0.553571	2429.19	2099.3	1.15714	1562.6	3515.86	0.444444	2158.96	3150.91	0.685185
19	681.766	1514.47	0.450168	3595.14	2821.5	1.27419	1814.22	2897.54	0.626124	3415.65	3074.08	1.11111
20	1129.75	2264.47	0.498903	1009.08	3896.18	0.258993	1265.52	2689.24	0.470588	1741.86	3694.85	0.471429
21	331.577	847.364	0.391304	6190.05	4194.91	1.47561	3114.27	5398.07	0.576923	951.962	2046.72	0.465116
22	509.203	1272.37	0.400201	1804.01	1157.57	1.55844	2227.44	6543.12	0.340425	2251.39	2967.74	0.758621
23	1293.16	3232.89	0.4	1337.09	709.479	1.88461	1597.88	3861.55	0.413793	2169.52	2456.06	0.883333
24	1274.85	4302.63	0.296296	1967.9	946.82	2.07843	1019.8	2379.54	0.428571	859.794	1432.7	0.60012
25	791.632	2302.93	0.34375	2778.53	1245.55	2.23077	658.443	1616.18	0.407407	2384.25	2831.3	0.842105
26	323.896	1089.47	0.297297	4144.31	2135.72	1.94048	1540.69	2270.49	0.678571	696.761	3466.82	0.20098
27	3383.4	6847.36	0.494118	2769.89	894.215	3.09756	343.11	1679.43	0.204301	1144.83	2933.63	0.390244
28	691.59	2272.37	0.304348	2962.64	2082.89	1.42237	516.807	2761.22	0.187166	373.493	3734.93	0.1
29	1049.13	2663.18	0.393939	4571	1755.03	2.60452	676.368	3762.29	0.179775	2912.72	4149.06	0.70202
30	873.844	1906.57	0.458333	5361.53	2297.8	2.33333	1193	3161.44	0.377358	1052.6	3684.1	0.285714
p65 N/C
	fluorescence intensity
	NC						RanGAP1 (KD)
	US			CD3/CD28			US			CD3/CD28
	p65 in nuclei	p65 in cytoplasmic	ratio	p65 in nuclei	p65 in cytoplasmic	ratio	p65 in nuclei	p65 in cytoplasmic	ratio	p65 in nuclei	p65 in cytoplasmic	ratio
1	1215.04	1822.55	0.666667	4101.31	2237.08	1.83333	2001.84	4108.97	0.487189	1081.55	952.792	1.13514
2	1740.84	2678.11	0.650024	2938.5	1001.26	2.93478	1494	2978.32	0.501625	1344.04	1799.27	0.746988
3	2745.27	4645.84	0.590909	2160.49	448.934	4.8125	1698.58	2547.86	0.666667	2663.29	3572.71	0.745455
4	1158.96	3319.94	0.349091	2143.46	3036.57	0.705882	642.751	2269.71	0.283186	2384.74	6072.26	0.392727
5	1217.27	1779.09	0.684211	2516.1	1213.12	2.07407	949.222	3134.64	0.302817	2219.58	2282.99	0.972222
6	2223.88	3947.72	0.563333	3375.56	1224.47	2.75676	299.372	1665.26	0.179775	2751.11	3561.97	0.772358
7	1171.71	1704.25	0.687519	1915.37	1542.25	1.24194	376.438	1721.85	0.218624	784.276	913.198	0.858823
8	1258.45	2876.47	0.437499	4851.31	2546.94	1.90476	1564.03	2800.12	0.558559	1573.96	2421.48	0.65
9	615.187	1119.94	0.549304	3557.8	2864.72	1.24194	480.163	982.66	0.488636	447.02	702.46	0.636364
10	1593.14	4460.79	0.357143	1417.53	802.024	1.76744	2004.7	6704.98	0.298987	1953.76	2664.22	0.733333
11	1697.35	3606.87	0.470588	1430.54	1612.87	0.886957	980.626	2778.44	0.352941	572.229	1018.57	0.561798
12	770.235	2824.19	0.272727	1141.91	873.907	1.30667	642.985	1821.79	0.352941	2813.64	3652.79	0.77027
13	738.083	1752.95	0.421053	4068.81	1860.03	2.1875	1271.52	2860.93	0.444444	2991.66	3290.82	0.909091
14	1467.16	1860.79	0.788462	2114.71	2084.5	1.01449	2006.93	4461.16	0.449868	2464.6	2282.99	1.07954
15	750.227	2438.24	0.307692	2796.23	1306.43	2.14035	799.031	3643.59	0.219298	1272.32	1088.81	1.16854
16	859.288	1460.79	0.588235	5399.56	5013.88	1.07692	2466.08	4726.66	0.521739	1815.59	2107.38	0.861538
17	333.895	1558.18	0.214286	823.048	708.204	1.16216	771.458	3856.71	0.20003	963.285	1580.53	0.609467
18	1219.18	3535.62	0.344828	1080.46	988.652	1.09286	780.24	2563.64	0.304348	2040.97	1650.78	1.23636
19	1383.35	2292.16	0.603514	2600.65	2447.67	1.0625	808.748	2426.25	0.333333	886.006	1615.66	0.548387
20	2229.52	4486.93	0.496892	1993.63	1235.81	1.61321	386.358	2704.51	0.142857	802.811	1229.3	0.653061
21	2630.57	5340.85	0.492537	2338.05	847.416	2.75904	2317.81	3874.17	0.598273	2190.02	1404.92	1.55882
22	2275.07	5486.93	0.414634	1177.32	1018.03	1.15646	678.164	917.517	0.73913	2144.74	2421.48	0.885714
23	1296.4	3535.62	0.366667	1351.13	1812.11	0.745614	3074.74	4304.63	0.714286	999.8	636.236	1.57143
24	2466.47	4624.62	0.533333	1174.92	988.652	1.18841	1609.67	3208.91	0.501625	2557.06	1615.66	1.58268
25	401.118	1243.46	0.322581	1178.11	1271.12	0.926829	1601.84	3737.64	0.428571	1174.13	1249.88	0.939394
26	1880.62	4535.62	0.414634	968.061	1376.8	0.703125	1933.85	5157.12	0.374986	3264.33	4704.47	0.693878
27	819.118	2730.39	0.3	791.243	1023.96	0.772727	645.695	2582.78	0.25	1268.03	1123.94	1.1282
28	1421.6	8326.5	0.170732	3388.25	3614.13	0.9375	1409.02	1878.38	0.750125	1783.17	1545.41	1.15385
29	1252.34	5456.62	0.229508	1898.38	1119.05	1.69643	1007.44	3369.77	0.298964	1223.11	1299.55	0.941176
30	314.961	1417.33	0.222222	1698.4	1730.14	0.981651	1335.66	2469.71	0.540816	2517.47	6545.41	0.384615
c-Jun N/C
	fluorescence intensity
	NC						RanGAP1 (KD)
	US			CD3/CD28			US			CD3/CD28
	c-Jun in nuclei	c-Jun in cytoplasmic	ratio	c-Jun in nuclei	c-Jun in cytoplasmic	ratio	c-Jun in nuclei	c-Jun in cytoplasmic	ratio	c-Jun in nuclei	c-Jun in cytoplasmic	ratio
1	960.567	2414.4	0.39785	3452.47	664.789	5.19333	2345.26	3517.89	0.666667	494.859	2659.87	0.186047
2	519.665	4114.02	0.126316	4013.87	1459.59	2.75	1160.84	1548	0.749896	582.914	2640.26	0.220779
3	661.247	1912.89	0.345679	2447.96	408.128	5.99802	3448.17	2293.68	1.50333	1566.18	664.44	2.35714
4	511.766	1828.4	0.279898	2253.72	411.738	5.47368	1130.99	2261.92	0.500012	2105.76	2183.75	0.964286
5	672.667	2219.8	0.30303	3950.42	1404.59	2.8125	653.065	1317.85	0.495555	852.443	1912.24	0.445783
6	1137.59	3128.38	0.363636	1750.03	1330.03	1.31579	769.841	1732.14	0.444444	861.497	1464.54	0.588235
7	1903.55	4187.81	0.454545	1823.76	1603.65	1.13725	1112.38	2595.55	0.428571	1179.94	3039.25	0.388235
8	879.073	1593.32	0.551724	1550.98	1778.45	0.872093	948.429	3556.61	0.266667	1741.49	1692.43	1.02899
9	2836.78	5538.47	0.512195	2599.63	972.034	2.67442	1108.32	2438.3	0.454545	1425.68	2730.02	0.522222
10	617.17	1322.51	0.466667	2734.32	962.075	2.84211	2119.25	1483.47	1.42857	494.165	2555.19	0.193396
11	1112.82	2933.79	0.37931	2957.58	1545.01	1.91429	1952.08	927.927	2.1037	432.985	1692.58	0.255814
12	2747.99	4210.01	0.652727	2235.64	1769.88	1.26316	1026.78	4138.09	0.248129	3308.95	1950.4	1.69655
13	1934.63	3879.59	0.498668	2432.81	1642.15	1.48148	1064.51	1596.76	0.666667	1280.21	687.775	1.86139
14	1673.94	2891.34	0.578947	3426.67	1230.09	2.78571	549.427	1922.99	0.285714	666.64	2591.09	0.257281
15	290.194	1487.24	0.195122	2232.33	1414.86	1.57778	642.022	1123.54	0.571429	2625.43	2437.9	1.07692
16	504.329	1204.78	0.418605	1309.55	841.851	1.55556	3817.58	2612.03	1.46154	501.792	3046.59	0.164706
17	1593.98	4383.45	0.363636	4252.48	2136.22	1.99065	1753.95	3257.33	0.538462	1363.66	5113.73	0.266667
18	533.054	1012.8	0.526316	1504.25	938.555	1.60273	664.702	997.053	0.666667	762.234	2347.68	0.324675
19	1185.95	3794.7	0.312527	1839.38	1079.63	1.7037	814.476	4343.87	0.1875	1423.43	3024.79	0.470588
20	1282.78	4104.88	0.312502	2244.28	2215.5	1.01299	747.578	2242.73	0.333333	1927.87	3161.71	0.609756
21	217.784	6043.49	0.036036	1613.27	1395.26	1.15625	1164.9	2459.22	0.473684	984.491	2756.57	0.357143
22	169.991	836.022	0.203333	1421.48	895.008	1.58824	938.994	1627.59	0.576923	1385.05	3571.97	0.387755
23	916.693	4125.12	0.222222	848.356	570.206	1.48781	9601.16	2693.01	3.56522	2902.42	3235.76	0.89698
24	307.505	1231.56	0.249688	2763.33	1829.77	1.5102	1039.76	2744.96	0.378788	695.046	1673.26	0.415385
25	766.134	3575.29	0.214286	2576	1463.17	1.76056	1541.47	2538.9	0.607143	2491.82	834.314	2.98667
26	647.042	2403.3	0.269231	2297.97	555.126	4.13954	1181.5	1592.46	0.741935	1647.56	2824.38	0.583333
27	1157.35	3761.4	0.307692	1376.63	1126.33	1.22222	1257.81	2236.11	0.5625	1329.48	3102.13	0.428571
28	1294.93	5503.46	0.235294	971.421	316.17	3.07246	457.104	1701.44	0.268657	655.01	3696.13	0.177215
29	455.675	1821.47	0.250168	3178.93	1084.58	2.93104	2426.66	2442.82	0.993385	859.104	3300.78	0.260273
30	816.753	5082.02	0.160714	1040.23	789.14	1.31818	376.24	1672.04	0.225018	2136.68	2441.93	0.875
c-Fos N/C
	fluorescence intensity
	NC						RanGAP1 (KD)
	US			CD3/CD28			US			CD3/CD28
	c-Fos in nuclei	c-Fos in cytoplasmic	ratio	c-Fos in nuclei	c-Fos in cytoplasmic	ratio	c-Fos in nuclei	c-Fos in cytoplasmic	ratio	c-Fos in nuclei	c-Fos in cytoplasmic	ratio
1	1512.08	3696.2	0.409091	2531.87	1588.72	1.59365	668.079	3817.59	0.175	1818.07	1800.75	1.00961
2	823.483	3292.29	0.250125	1915.49	1344.43	1.42475	1255.75	1940.7	0.647059	867.778	1770.27	0.490196
3	1113.37	2974.28	0.374332	607.216	535.779	1.13333	1151.47	1527.21	0.753968	1062.37	1669.44	0.636364
4	1699.96	2974.93	0.571429	2849.17	815.791	3.49253	601.097	2247.58	0.267442	966.115	982.772	0.983051
5	816.255	2448.76	0.333333	1532.68	1149.57	1.33326	609.075	3464.11	0.175824	1001.48	813.703	1.23077
6	734.117	4551.53	0.16129	958.289	884.575	1.08333	1261.01	1986.09	0.634921	1713.98	1613.16	1.0625
7	1458.9	2309.92	0.631579	2058.06	931.366	2.20972	578.928	1190.94	0.486111	2925.13	1728.49	1.69231
8	1722.7	1531.28	1.125	1892.01	1589.29	1.19048	664.104	1878.54	0.353521	3421.67	1207.65	2.83333
9	732.055	3294.25	0.222222	2413.95	1392.66	1.73333	1134.81	1931.6	0.5875	1500.54	1482.73	1.01201
10	604.889	2238.09	0.27027	1751.88	382.453	4.58064	482.318	3999.71	0.120588	942.731	3074.12	0.306667
11	688.139	3211.32	0.214286	2021.97	1164.48	1.73636	1097.22	2009.75	0.545946	2219.36	1346.47	1.64828
12	733.93	1379.79	0.531915	2636.56	462.407	5.70181	594.286	1650.38	0.36009	951.537	3151.59	0.301923
13	1302.65	2442.48	0.533333	963.356	760.544	1.26667	1390.24	1867.48	0.744444	823.169	2351.91	0.35
14	1663.73	2250.49	0.739273	3453.11	699.553	4.93617	860.579	2791.07	0.308333	2652.73	2115.67	1.25385
15	1495.18	1334.08	1.12075	4269.6	1176.66	3.62857	1216.55	2239.42	0.543243	1516.16	1312.88	1.15484
16	1195.59	988.658	1.2093	3746.79	1085.81	3.45069	1180.02	2308.02	0.511268	811.122	1131.8	0.716667
17	474.078	1422.23	0.333333	3047.07	1844.43	1.65203	429.505	1407.62	0.305128	961.399	856.692	1.12222
18	3073.72	2042.58	1.50482	2396.84	1868.48	1.28278	901.439	3078.09	0.292857	1245.98	1053.26	1.18298
19	2004.14	3499.29	0.572727	1402.38	606.798	2.31111	864.306	3508.57	0.246341	2920.52	2166.84	1.34783
20	1943.19	2403.95	0.808333	4077.18	1468.08	2.77721	1417.97	1195.88	1.18571	1523.03	1838.14	0.828571
21	2085.93	3091.16	0.674803	1887.11	534.255	3.53223	1072.67	2738.72	0.391667	782.027	1646.37	0.475
22	364.224	933.137	0.390323	3625	1416.78	2.55862	794.319	2790.85	0.284615	1975.86	1823.87	1.08333
23	1210.6	2527.62	0.478947	3112.77	1042.42	2.98611	671.259	1160.82	0.578261	1670.84	2638.17	0.633333
24	446.434	1339.3	0.333333	1739.99	312.307	5.57143	1023.94	3496.38	0.292857	648.96	2296.32	0.282609
25	993.72	1783.6	0.557143	3405.19	1560.63	2.18193	421.871	1765.97	0.238889	1851.53	2358.26	0.785124
26	760.313	1642.95	0.462774	3740.22	860.051	4.34884	1235.23	954.248	1.29445	2968.08	1455.68	2.03896
27	1426.98	4154.5	0.343478	2692.3	1056.28	2.54884	743.717	1782.46	0.417241	1712.26	830.185	2.0625
28	367.067	1745.07	0.210345	1805.34	1021.44	1.76746	1493.65	1388.83	1.07547	603.428	2074.28	0.290909
29	2749.84	1551.53	1.77234	3812.63	1594.92	2.39048	2616.96	1880.69	1.39149	901.467	758.052	1.18919
30	1871.65	1518.22	1.23279	1448.04	691.982	2.09259	1185.67	1943.07	0.610204	761.583	2393.55	0.318182
Figure 6 D ELISA
	NC		NC+HA-RanGAP1		NC+HA-RanGAP1AA		RanGAP1(KD)		RanGAP1(KD)+HA-RanGAP1		RanGAP1(KD)+HA-RanGAP1AA
	US	CD3/CD28	US	CD3/CD28	US	CD3/CD28	US	CD3/CD28	US	CD3/CD28	US	CD3/CD28
IL-2 (pg/mL)	35.5	169.25	28.75	165	28.75	165	17.5	37.5	29.5	150.75	29	37.5
	24.5	180.75	31.25	177.5	26.25	170	17.25	22.5	26.25	164	22.5	45
	24.5	155.75	38.75	187.5	37.5	172.5	31.25	31.25	23.75	145.75	27.5	27.5

## Sheet: Row data figure supplement 1
Figure6─figure supplement 1 B
QPCR
	NC	RanGAP1(KD)
RanGAP1 mRNA level（fold change）	1.02082	0.707023
	0.972527	0.637136
	1.00688	0.673525
	1.00688	0.65057
	0.986131	0.687638
	1.00688	0.678116
	1.02082	0.702091
	0.986131	0.692399
	0.992933	0.624043
Figure6─figure supplement 1 D
	NF-ATc1 N/C						P65 N/C						c-Jun N/C						c-Fos N/C
	NC		RanGAP1(KD)				NC		RanGAP1(KD)				NC		RanGAP1(KD)				NC		RanGAP1(KD)
	US	CD3/CD28	US	CD3/CD28			US	CD3/CD28	US	CD3/CD28			US	CD3/CD28	US	CD3/CD28			US	CD3/CD28	US	CD3/CD28
1	0.212245	2.92683	0.572581	0.545455		1	0.203704	2.65625	0.309524	0.295918		1	0.268293	1.13839	0.752427	0.446154		1	0.359155	1.51139	0.314607	0.46988
2	0.575758	4.06452	0.756757	0.285714		2	0.461539	1.53543	0.23622	0.454545		2	0.329268	1.30102	0.642857	0.0945946		2	0.348485	1.08163	0.410256	0.818182
3	0.230769	2.72727	0.30303	0.234375		3	0.349206	2.57983	0.252525	0.263889		3	0.624667	2.52294	0.402333	0.357143		3	0.447917	1.30357	0.288	0.274725
4	0.338028	1.98942	0.354839	0.291667		4	0.361702	1.3125	0.41573	0.17		4	0.380952	2.7551	0.183099	0.734375		4	0.225225	1.37209	0.345454	0.323529
5	0.348315	0.875	0.294872	0.392683		5	0.539683	0.944444	0.505618	0.622222		5	0.121739	1.55556	0.571429	0.313131		5	0.373737	1.375	0.272727	0.347222
6	0.333333	1.28571	0.271605	0.428571		6	0.370968	1.42023	0.269231	0.285156		6	0.503497	1.52381	0.278481	0.214286		6	0.292453	1.2439	0.224138	0.624962
7	0.683673	3.0303	0.395833	0.434783		7	0.627119	1.56757	0.44086	0.25641		7	0.422535	2.15969	0.901961	0.21875		7	0.342593	1.54839	0.22807	0.382353
8	0.445946	1.49621	0.239474	0.406452		8	0.555556	1.51219	0.370787	0.211864		8	0.155556	1.66667	0.445946	0.465116		8	0.333333	1.3125	0.28	0.571429
9	0.197802	1.01887	0.102564	0.222222		9	0.359551	1.87692	0.707865	0.232323		9	0.333333	3.28571	0.166667	0.410256		9	0.375	2.23809	0.485714	0.376147
10	0.779412	1.88889	0.192308	0.825		10	0.314685	1.25373	0.350877	0.259516		10	0.561404	1.39837	0.483871	0.530303		10	0.266667	1.33333	0.216495	0.352941
11	0.180851	1.40625	0.163934	0.181818		11	0.357143	1.2549	0.309524	0.205882		11	0.464286	2.33333	0.4375	0.325		11	0.271429	1.47541	0.458333	0.625
12	0.424242	1.51724	0.266667	0.218182		12	0.333333	1.05405	0.185185	0.433735		12	0.421875	1.96226	0.162162	0.748095		12	0.434783	1.48889	0.179487	0.448276
13	0.204819	1.73529	0.34375	0.290909		13	0.414634	1.78261	0.352941	0.231884		13	0.77551	2.07407	0.283951	0.456522		13	0.371429	0.96875	0.354839	0.453333
14	0.241379	1.02857	0.481482	0.758621		14	0.412214	2.62963	0.4	0.313559		14	0.481482	1.88235	0.397661	0.383459		14	0.232558	1.95833	0.410256	0.666667
15	0.586207	1.62791	0.369231	0.166667		15	0.759036	1.48148	0.402597	0.208556		15	0.502597	1.3125	0.455975	0.333333		15	0.213483	1.70175	0.55	0.366197
16	0.589744	1.73611	0.3125	0.504819		16	0.224638	3.17949	0.466667	0.203883		16	0.381773	0.777778	0.295918	0.388889		16	0.30303	1.6129	0.350877	0.202381
17	0.337662	2.33962	0.444444	0.307692		17	0.263889	1.62295	0.28169	0.263158		17	0.321429	4.72727	0.397727	0.323529		17	0.267442	1.08333	0.336956	0.240388
18	0.245902	1.69565	0.462121	0.222222		18	0.340206	1.34328	0.165289	0.28436		18	0.18	2.07407	0.803571	0.365854		18	0.521127	0.847458	0.477273	0.565217
19	0.4375	1.07463	0.155556	0.49101		19	0.91579	1.44681	0.336539	0.424		19	0.463636	2.38775	0.339744	0.209876		19	0.842593	1.66667	0.315068	0.333333
20	0.305556	1.39535	0.14876	0.333333		20	0.236842	1.94118	0.209677	0.53125		20	0.210526	2.76471	0.228347	0.578947		20	0.495122	1.06897	0.202532	0.439412
21	0.508772	1.44444	0.373239	0.642857		21	0.417911	1.01136	0.238636	0.220657		21	0.52071	2.20879	0.397059	0.333333		21	0.571429	1.51724	0.611111	0.322581
22	0.47191	2.64463	0.357143	0.166667		22	0.315068	1.34848	0.555556	0.513158		22	0.114286	0.944444	0.412844	0.380952		22	0.454545	1.51515	0.223881	0.291667
23	0.556962	2.60702	0.233333	0.249364		23	0.354167	1.35484	0.232558	0.452703		23	0.419355	1.19512	0.28125	0.447761		23	0.402381	1.22222	0.409836	0.235294
24	0.363636	2.96296	0.553191	0.285714		24	0.322314	1.70423	0.355073	0.3125		24	0.275362	1.12195	0.327161	0.359551		24	0.444444	0.888889	0.407407	0.507692
25	0.352273	1.95652	0.375	0.555556		25	0.378641	1.20879	0.301471	0.271186		25	0.190476	0.779412	0.340909	0.735294		25	0.298264	1.68965	0.642857	0.363636
26	0.719298	1.88235	0.149533	0.394737		26	0.490196	1.45454	0.301282	0.236559		26	0.313953	1.54286	0.288461	0.265957		26	0.555556	0.979592	0.285714	0.38806
27	0.40625	2.27848	0.476191	0.272727		27	0.397959	0.956522	0.306667	0.294118		27	0.357143	1.32432	0.438775	0.310345		27	0.673469	1.51111	0.478261	0.404255
28	0.454545	1.29214	0.240741	0.555556		28	0.27551	4.125	0.181818	0.141975		28	0.569893	1.6875	0.45098	0.253012		28	0.239316	1.19149	0.268293	0.315217
29	0.431034	1.69697	0.816327	0.428571		29	0.176796	1.84091	0.271739	0.382114		29	0.202381	1.23913	0.641026	0.354839		29	0.531469	1.92308	0.439866	0.494444
30	0.280702	2.14286	0.444444	0.25		30	0.308219	3.625	0.191057	0.586956		30	0.363636	2.18519	0.595238	0.272727		30	0.520468	1.04444	0.555556	0.192308
Figure6─figure supplement 1 G
	NF-ATc1 N/C								p65 N/C								c-Jun N/C
	siRanGAP1		siRanGAP1+HA-RanGAP1		siRanGAP1+HA-RanGAP1AA				siRanGAP1		siRanGAP1+HA-RanGAP1		siRanGAP1+HA-RanGAP1AA				siRanGAP1		siRanGAP1+HA-RanGAP1		siRanGAP1+HA-RanGAP1AA
	US	CD3/CD28	US	CD3/CD28	US	CD3/CD28			US	CD3/CD28	US	CD3/CD28	US	CD3/CD28			US	CD3/CD28	US	CD3/CD28	US	CD3/CD28
1	0.195295	0.931977	0.472174	0.207168	0.16911	0.352501		1	0.577269	0.931977	0.367492	0.620957	0.771266	0.135702		1	0.289721	1.13803	0.17915	0.13865	0.507905	0.297392
2	0.135874	2.85723	0.256057	0.737616	0.10276	0.985667		2	0.202328	2.85723	0.225287	1.04773	0.249325	0.28087		2	0.256476	1.32111	0.348026	0.416064	0.77374	0.335088
3	0.27539	2.91987	0.280455	0.205525	0.211259	0.243335		3	0.180207	2.91987	0.141058	0.839709	0.468041	0.485727		3	0.333089	1.37512	0.421411	0.547606	0.314701	0.728995
4	0.393287	3.47432	0.282845	0.271726	0.17899	0.590063		4	0.133996	3.47432	0.361751	0.37611	0.224619	0.398429		4	0.133089	5.52396	0.245001	1.379	0.559697	0.547112
5	0.197021	2.59217	0.360929	1.3463	0.417667	0.248274		5	0.158941	2.59217	0.357409	0.359642	0.555705	0.88048		5	0.073747	2.08967	0.343112	0.685985	0.347319	0.394134
6	0.76113	2.49382	0.165212	0.791746	0.07199	0.184922		6	0.141904	2.49382	0.591351	0.492369	0.307718	0.230571		6	1.24513	4.67861	0.354842	1.17141	0.145028	0.293748
7	0.28939	1.01917	0.33184	0.14461	0.094931	0.713421		7	0.8979	1.01917	0.693718	0.742868	0.671042	1.51577		7	0.132657	4.43817	0.302245	0.640279	0.302378	0.231187
8	0.118144	1.10935	0.548875	0.453813	0.229593	0.147798		8	0.40845	1.10935	0.40973	1.73762	0.127341	0.845012		8	0.703389	1.92532	0.608892	0.530816	0.610707	0.662382
9	0.495295	1.48622	0.175209	0.676762	0.226157	0.207047		9	0.425097	1.48622	0.261743	0.329886	0.223921	1.23332		9	0.208507	1.53134	0.295443	0.316396	0.146275	0.44739
10	0.27572	2.56143	0.12782	0.25785	0.159044	0.304735		10	0.191664	2.56143	0.191714	0.629422	0.397359	0.238673		10	0.145465	0.896967	0.161424	1.37	0.155899	1.58481
11	0.399114	0.63274	0.552469	0.400996	0.297648	0.849546		11	1.16143	0.63274	0.364849	0.343971	0.106339	0.222853		11	0.239004	1.60127	0.377611	1.88362	0.837748	0.407423
12	0.242127	1.53866	0.257816	0.261838	0.583687	0.215195		12	0.204703	1.53866	0.35215	1.34635	0.54932	0.318312		12	1.88755	1.55214	0.516339	0.378409	0.234318	0.180349
13	0.5776	2.12543	0.258938	0.260895	0.232054	0.238827		13	0.257526	2.12543	0.108655	0.547187	0.231679	0.622123		13	0.167025	1.52644	1.39667	1.19733	0.152594	1.69813
14	0.391428	2.48861	0.245485	0.292829	0.395776	0.27041		14	0.388505	2.48861	0.782867	0.771993	0.091343	0.10276		14	0.363707	0.964337	0.654757	1.47607	0.922548	1.27774
15	0.22142	1.17334	0.277649	0.363496	0.29765	0.261896		15	0.231419	1.17334	0.0897984	0.306708	0.131363	0.787053		15	0.638044	0.748582	0.639609	0.521177	1.19958	0.184713
16	0.219296	0.887214	0.433332	0.232655	0.404802	0.454524		16	0.672201	0.887214	0.252811	0.931936	0.423108	0.501276		16	0.187907	0.496894	0.192904	0.62071	0.236979	0.524326
17	0.220718	1.22629	0.266557	0.462199	0.340768	0.424622		17	0.185948	1.22629	0.264467	0.250229	0.763885	0.350719		17	0.588453	2.60558	0.202347	1.92747	0.21638	0.547641
18	0.221711	0.725657	0.677924	0.534175	0.225728	0.429031		18	0.172634	0.725657	0.522858	0.581669	0.212193	0.327672		18	0.280696	1.89396	0.384615	0.481266	0.187339	0.915826
19	0.364251	1.36862	0.588534	0.281279	0.196133	0.111219		19	0.417641	1.36862	0.715129	0.277714	0.45479	0.214285		19	0.131556	1.28077	0.0696196	0.828187	0.339589	0.27467
20	0.228755	1.70307	0.199272	0.26502	0.172093	0.404378		20	0.485712	1.70307	0.14983	1.72288	0.193263	0.602773		20	0.240892	1.00671	0.215732	0.225291	0.164721	0.177479
