# Supplementary material for: T-cell receptor (TCR) signaling promotes the assembly of RanBP2/RanGAP1-SUMO1/Ubc9 nuclear pore subcomplex via PKC-θ-mediated phosphorylation of RanGAP1
Source: eLife. 2021 Jun 10;10:e67123. doi: 10.7554/eLife.67123 (PMC8225385; doi:10.7554/eLife.67123)
Supplement: Figure 7—source data 2. [file elife-67123-fig7-data2.xlsx]

## Sheet: Sheet1
Figure 8B
		Importin β1/lamin B1 (nuclei)					CRM1/lamin B1 (nuclei)					NXF1/lamin B1 (nuclei)					Dis3/lamin B1 (nuclei)					RPS3/lamin B1 (nuclei)
		NC		siPKC-θ			NC		siPKC-θ			NC		siPKC-θ			NC		siPKC-θ			NC		siPKC-θ
	CD3/CD28	-	+	-	+		-	+	-	+		-	+	-	+		-	+	-	+		-	+	-	+
1		1	0.509815	1.08884	0.458188		1	3.04514	2.56517	2.9201		1	1.62536	1.18215	1.43558		1	0.339656	1.73554	1.27772		1	0.653238	0.378279	0.602267
2		1	0.650705	1.16962	0.646099		1	2.07328	3.53182	2.45223		1	1.58407	1.01392	1.70141		1	0.293923	1.02959	0.529977		1	0.591944	0.374112	0.387738
3		1	0.754481	1.25666	0.742999		1	2.70758	1.8856	2.35794		1	2.16534	1.15003	2.05453		1	0.73695	1.06394	1.39159		1	0.691502	0.782895	0.896703
		RPL26/lamin B1 (nuclei)					p53/lamin B1 (nuclei)					H1/lamin B1 (nuclei)					H2B/lamin B1 (nuclei)					H3/lamin B1 (nuclei)
		NC		siPKC-θ			NC		siPKC-θ			NC		siPKC-θ			NC		siPKC-θ			NC		siPKC-θ
	CD3/CD28	-	+	-	+		-	+	-	+		-	+	-	+		-	+	-	+		-	+	-	+
1		1	0.621026	1.31683	0.456452				1	1.00958		1	0.994775	0.953452	0.887585		1	0.679127	0.600233	0.609819		1	0.70138	0.758447	0.665269
2		1	0.734058	0.855666	0.932142				1	0.91145		1	0.677147	1.73829	1.61582		1	1.43521	0.780154	1.20252		1	1.06352	0.765932	1.31115
3		1	0.899304	1.51205	0.597892				1	0.681487		1	0.879209	0.9725	1.28346		1	0.992675	0.538557	0.415242		1	1.19442	1.10102	1.2328
