# Supplementary material for: T-cell receptor (TCR) signaling promotes the assembly of RanBP2/RanGAP1-SUMO1/Ubc9 nuclear pore subcomplex via PKC-θ-mediated phosphorylation of RanGAP1
Source: eLife. 2021 Jun 10;10:e67123. doi: 10.7554/eLife.67123 (PMC8225385; doi:10.7554/eLife.67123)
Supplement: Figure 8—source data 2. [file elife-67123-fig8-data2.xlsx]

## Sheet: Sheet1
Figure 7 C
P65 N/C Splenic T cells
	WT						Prkcq-/-						Prkcq-/- +GFP-RanGAP1AA						Prkcq-/- +GFP-RanGAP1EE
	US			CD3/CD28			US			CD3/CD28			US			CD3/CD28			US			CD3/CD28
	nuclei	cytosol	ratio	nuclei	cytosol	ratio	nuclei	cytosol	ratio	nuclei	cytosol	ratio	nuclei	cytosol	ratio	nuclei	cytosol	ratio	nuclei	cytosol	ratio	nuclei	cytosol	ratio
1	6420.2	5707.27	1.12492	4667.21	1820.27	2.56402	1519.54	1624.91	0.935153	1574.68	3227.76	0.487855	1145.68	1353.68	0.846345	1516.34	1582.86	0.957975	4020.04	7861.4	0.511365	2713.82	2687.41	1.00982
2	2939.76	2898.83	1.01412	5339.5	2599.75	2.05385	2500.91	4549.67	0.54969	2591.66	2377.99	1.08985	1857.2	5556.59	0.334234	1156.05	1070.74	1.07968	5312.91	7468.94	0.711334	2750.47	4277.24	0.643049
3	3801.67	3186.78	1.19295	3900.26	1337.79	2.91545	991.921	1436.05	0.690727	1027.92	1199.01	0.857305	1474.53	1326.16	1.11188	1737.06	1805.87	0.961893	2400.83	2570.44	0.934016	1557.51	1356.76	1.14796
4	3647.32	3336.69	1.09309	5026.86	1624.42	3.09456	1582.85	5862.44	0.269999	1640.29	2025.85	0.809681	2206.5	8465.82	0.260636	2043.77	3516.05	0.581269	1751.48	4425.3	0.395788	2644.62	3119.13	0.847873
5	3811.38	3482.76	1.09435	3109.73	1129.17	2.75399	1076.36	1560.93	0.689565	2708.28	3766.6	0.719027	1516.97	1911.86	0.793449	2206.24	2397.96	0.920049	1171.7	840.431	1.39417	1475.99	4187.37	0.352486
6	5899.91	5345.85	1.10364	5810.91	2453.48	2.36844	956.768	1797.18	0.532372	1074.17	1759.7	0.610428	1633.66	3174.42	0.514632	1955.71	5052.69	0.387062	1373.25	4343.24	0.31618	1628.53	4815.35	0.338196
7	2050.34	7103.38	0.288643	4626.27	1765.28	2.6207	1385.32	2144.1	0.646109	1714.1	2432.8	0.70458	1538.18	1957.59	0.785755	1893.45	1398.28	1.35413	4558.96	9446.75	0.482595	2452.55	3083.13	0.795476
8	7535.8	29287.9	0.257301	3074.45	1017.36	3.022	2073	3890.76	0.5328	2830.16	2510.39	1.12738	1124.46	1810.94	0.620929	1579.48	1449.78	1.08947	1129.19	5191.3	0.217515	1138.89	2097.33	0.543019
9	3320.69	18032.3	0.184152	3526.99	1527.32	2.30926	1425.19	2210.43	0.644755	1122.51	1830.65	0.613176	1601.83	2105.6	0.760749	2039.47	2102.2	0.970159	1136.92	2610.94	0.435443	1893.52	2423.91	0.781186
10	4033.85	7318.23	0.551205	2906.06	838.415	3.46613	2204.82	4752.43	0.463934	1450.38	2685.91	0.539996	1747.22	2519.19	0.693565	1556.54	2906.95	0.535454	1780.22	8703.98	0.204529	1808.87	1717.14	1.05342
11	1884.47	10019.7	0.188077	1443.64	404.617	3.56791	2060.06	2340.33	0.880242	2387.08	5420.72	0.440362	1263.37	1963.54	0.643415	2211.47	1901.6	1.16295	2274.45	3100.72	0.733521	4039.65	11603.9	0.348129
12	5665.94	7474.75	0.758011	1132.34	445.858	2.53969	1815.08	13228	0.137215	2246.97	3314.92	0.677835	1379.86	2123.57	0.649782	1258.42	1878.79	0.669805	2015.82	4279.98	0.470989	1725.83	3938.22	0.438226
13	4361	5824.06	0.74879	4654.32	2053.46	2.26658	1202.63	1874.27	0.641651	2419.81	4106.13	0.589317	1774.1	3100.25	0.572245	1602.39	1885.29	0.849943	3986.72	4738.29	0.841383	1520.6	2660.25	0.571599
14	4438.19	16899.3	0.262625	4929.35	1781.19	2.76745	1069	922.966	1.15823	1988.38	4938.4	0.402637	1657.62	1723.53	0.961756	1415.03	3480.13	0.406601	1541.01	1947.5	0.791274	1007.51	907.787	1.10986
15	4623.8	8871.33	0.521207	2840.99	1107.36	2.56555	2716.83	2761.89	0.983684	1753.42	1143.42	1.53349	1346.26	2360.52	0.570322	1338.59	1599.43	0.836915	2141.23	2286.27	0.936559	1474.75	1810.55	0.814529
16	5436.4	5127.63	1.06022	3609.96	1964.14	1.83793	833.16	3713.91	0.224335	1335.24	2445.78	0.545938	1533.48	3673.87	0.417403	1945.43	2281.51	0.852695	1617	2974.43	0.543634	2571.55	8542.4	0.301034
17	5936.23	13878.2	0.427738	1488.11	402.121	3.70064	1304.08	1990.62	0.655112	1503.98	1697.59	0.885952	1711.8	2103.86	0.813646	1484.01	1609.7	0.921917	1946.18	2437.77	0.798344	1823.84	1789.21	1.01935
18	1206.99	957.807	1.26016	2490.59	1214.84	2.05014	2146.29	3546.79	0.605136	1272.93	1602.18	0.794495	1471.08	2433.22	0.604579	1643.09	2797.09	0.587428	1423.23	6022.3	0.236326	1559.79	2838.97	0.549419
19	1355.09	8860.77	0.152931	2620.84	868.492	3.01769	2020.31	2125.65	0.950446	1644.73	2461.6	0.668155	1471.08	1750.08	0.840575	2067.64	2774.57	0.745212	1625.43	1875.19	0.866807	1901.35	2871.42	0.662163
20	2607.68	3326.82	0.783836	2775.71	1134.29	2.44709	2175.72	1981.79	1.09786	2706.95	10159.2	0.266452	1230.35	2342.59	0.525212	1015.41	1194.64	0.849975	1331.75	1977.47	0.673465	1631.51	5737.31	0.284369
21	2173	8922.93	0.24353	2842.18	1035.81	2.74391	2048.57	3853.47	0.531616	2548.06	4127.16	0.617389	1548.47	1850.63	0.836728	1545.92	3577.71	0.432097	1217.41	1258.61	0.967268	2275.92	2212.04	1.02888
22	1763.01	10075.7	0.174976	2839.81	1176.27	2.41425	1497.57	4111.31	0.364257	2744.07	3078.84	0.891265	1700.33	3958.9	0.429494	1178.61	2353.79	0.500727	2831.33	7245.76	0.390756	1664.53	2008.32	0.828819
23	2016.35	3336.59	0.604313	2514.3	1056.66	2.37947	2133.34	2745.33	0.777078	860.864	2451.15	0.351208	1349.98	1739.36	0.776137	1770.94	7251.46	0.244219	1853.4	1604.42	1.15518	2098.31	1874.52	1.11938
24	1193.82	3264.81	0.365664	3817.53	1806.83	2.11284	1881.25	7430.49	0.25318	1347.44	2161.79	0.623299	2020.12	2959.76	0.682528	1198.53	1974.97	0.606857	2328.13	2520.29	0.923755	3036.46	6687.58	0.454045
25	5836.53	18055.5	0.323255	2268.43	890.207	2.54821	1432.59	7986.58	0.179374	2217.66	5071.49	0.43728	1388.83	1758.9	0.789602	1552.79	2998.77	0.517808	2344.07	7131.35	0.328699	4203.45	5252.75	0.800239
26	1924.19	4096.7	0.469692	3480.35	1907.65	1.82442	1613.63	3577.01	0.451111	2087.49	3329.98	0.626879	1495.66	3373.4	0.44337	1299.61	2152.25	0.603835	1523.25	4581.38	0.332486	1628.2	2234.12	0.728789
27	3812.59	18277.6	0.208594	1809.42	903.993	2.00159	1534.91	1382.93	1.1099	2248.07	6251.08	0.359629	1523.95	1730.75	0.880511	1488.01	3366.62	0.441989	2408.96	2773.97	0.868416	1809.12	2170.29	0.833583
28	3621.07	21486.9	0.168525	1335.47	545.415	2.44854	1109.86	1297.11	0.855642	2116.69	2520.45	0.839805	2206.55	4976.76	0.44337	1631.45	1683.72	0.96896	2171.02	3982.9	0.545086	1479.22	3074.11	0.481186
29	3867.84	12564.8	0.307832	2664.9	691.75	3.8524				1452.64	2554.94	0.568563	3301.88	4034.29	0.818455	1761.15	1653.34	1.06521	1532.35	6211.86	0.246682	1516.04	1861.25	0.814529
30	3505.71	4263.59	0.822244	1538.2	627.916	2.44969				1935.52	2770.84	0.698533	1143.02	1400.39	0.816212				3059.02	7178.61	0.426129	1442.09	6307.24	0.22864
31	1616.54	4569.13	0.353796	2297.5	1160.27	1.98014				1457.9	1894.71	0.769457	1852.88	2318.36	0.79922				3681.75	3038.8	1.21158	1722.57	1893.36	0.909795
32				2745.21	855.558	3.20868				1560.74	3011.11	0.518329	1471.1	1899.79	0.774353							2200.8	2321.75	0.947903
33				2840.92	1395.22	2.03619				1587.13	2779.82	0.570946										1950.55	7574.39	0.257519
34				3698.97	1684.1	2.1964				1420.15	2539.69	0.559185										2372.06	4440.41	0.534198
35				2901.35	970.287	2.99019																2832.84	3197.41	0.885979
																						1355.83	1779	0.762133
c-Jun N/C Splenic T cells
	WT						Prkcq-/-						Prkcq-/- +GFP-RanGAP1AA						Prkcq-/- +GFP-RanGAP1EE
	US			CD3/CD28			US			CD3/CD28			US			CD3/CD28			US			CD3/CD28
	nuclei	cytosol	ratio	nuclei	cytosol	ratio	nuclei	cytosol	ratio	nuclei	cytosol	ratio	nuclei	cytosol	ratio	nuclei	cytosol	ratio	nuclei	cytosol	ratio	nuclei	cytosol	ratio
1	2284.54	2982.31	0.766029	6192.15	2169.55	2.85412	1431.15	2718.99	0.526355	1544	2583.42	0.597656	2577.02	2933.32	0.878534	1323.02	1217.84	1.08637	2719.71	2647.13	1.02742	3107.26	2351.76	1.32125
2	2586.87	2783.09	0.929496	1821.46	493.382	3.69178	2240.06	2651.38	0.844867	1715.55	1604.54	1.06918	1863.38	2983.5	0.624564	3388	3014.54	1.12388	3474.77	3088.43	1.12509	3452.51	1800.81	1.9172
3	1355.51	4671.19	0.290184	2176.4	466.761	4.66277	3686.77	6767.32	0.544791	1402.71	3057.72	0.458746	2035.19	2431.67	0.836951	1663.84	1289.41	1.29039	3079.66	6542.73	0.4707	2822.94	1650.7	1.71014
4	848.943	2859.18	0.296919	5206.86	1717.42	3.03179	1462.26	2005.97	0.728957	857.775	2916.44	0.294118	2616.67	5484.36	0.477114	1514.6	941.658	1.60844	6090.69	3703.22	1.6447	1726.26	1043.48	1.65433
5	6234.93	1284.43	4.85425	2329.51	673.497	3.45884	2333.4	6288.51	0.371058	3027.44	4180.75	0.724138	2444.87	3033.36	0.805992	1602.45	1869.21	0.857287	8049.48	7145.75	1.12647	6092.67	3443.05	1.76956
6	1834.04	6104.78	0.300426	3551.48	1252.2	2.83618	3717.88	4089.81	0.909061	928.415	2674.24	0.34717	2154.12	2526.69	0.852547	1520.95	1240.55	1.22602	1635.62	5913.72	0.276581	3287.35	1627.67	2.01966
7	2191.43	7497.33	0.292295	3737.21	1787.88	2.09031	2831.19	2917.84	0.970303	1453.17	2522.87	0.576	1427.27	989.852	1.44191	1210.83	1356.05	0.892914	2089.71	4016.82	0.520241	4199.99	2933.88	1.43155
8	5242.82	12482.6	0.420011	3958.05	1899.95	2.08324	3188.98	2876.49	1.10864	2391.68	1564.18	1.52903	1268.69	1166.86	1.08727	1424.63	1739.44	0.819016	1852.1	4741.24	0.390635	3722.42	2639.58	1.41023
9	2399.67	8927.83	0.268785	1753.09	438.912	3.99418	3033.42	7192.84	0.421728	948.598	2664.15	0.356061	1836.95	2171	0.846132	1537.88	1527.4	1.00686	3662.91	4378.27	0.83661	3680.94	1507.61	2.44158
10	2345.61	2554.84	0.918103	2227.6	693.061	3.21415	1382.38	1023.32	1.35087	1513.72	1927.47	0.78534	2748.82	5251.51	0.523435	1363.24	2165.02	0.629669	4840.92	3662.91	1.32161	4864.74	2208	2.20324
11	4456.95	3471.86	1.28374	1814.25	834.828	2.1732	1535.97	1295.34	1.18577	2411.86	1745.82	1.3815	951.562	1928.84	0.493335	1039.34	879.116	1.18225	5710.33	6229.87	0.916606	5123.13	2217.14	2.31069
12	3495.88	5967.39	0.585831	4423.5	2168.79	2.03962	1255.89	1146.41	1.0955	1836.65	2504.52	0.733333	1542.53	1793.05	0.86028	1561.68	2058.43	0.758675	9584.18	7480.14	1.28128	3901.3	1146.91	3.40156
13	2773.08	3692.77	0.750948	2628.5	940.984	2.79336	1552.63	2512.25	0.618024	2068.75	2442.89	0.846847	1224.7	1317.9	0.929281	1837.43	2007.76	0.915164	7323.81	5879.99	1.24555	4394.32	2438.01	1.80242
14	2725.03	2037.26	1.33759	4032.79	1698.77	2.37395	2710.54	2462.92	1.10054	1967.84	1180.7	1.66667	1832.64	3369.3	0.543922	1983.5	2443.35	0.811795	7872.54	6027.29	1.30615	4179.96	1389.07	3.00917
15	2412.68	3669.08	0.657572	1814.25	701.291	2.58701	831.234	774.436	1.07334	1422.9	1493.54	0.952703	1259.94	1645.24	0.765808	1758.25	1574.19	1.11692	1121.12	2386.23	0.469831	2253.28	1286.54	1.75143
16	1605.78	7114.9	0.225693	2335.19	751.599	3.10696	1301.06	1012.53	1.28496	1554.09	3683.39	0.421918	1356.86	1066.67	1.27205	1702.28	1631.39	1.04346	1855.62	5980.67	0.310269	3729.5	1688.26	2.20908
17	3139.49	3887.81	0.80752	2170.49	863.269	2.51427	2141.33	1813.56	1.18073	1998.11	3122.05	0.64	1277.56	3302.08	0.386896	2717.47	2159.29	1.2585	4618.41	3133.31	1.47397	4641.14	2446.61	1.89696
18	3303.67	2578.86	1.28106	2593.45	1026.54	2.52641	1454.69	5679.83	0.256115	1866.92	2119.21	0.880952	933.941	870.017	1.07347	1982.13	2115.05	0.937158	6671.37	7377.97	0.904228	3965.6	2524.03	1.57114
19	3498.89	2673.97	1.3085	6204.62	3134.09	1.97972	1063.43	4602.59	0.23105	1644.91	1321.98	1.24427	1330.43	2039.07	0.652466	1234.05	1453.65	0.848933	6995.07	5704.29	1.22628	3494.02	2471.85	1.41353
20	1549.72	3519.91	0.440273	4579.41	1299	3.52533	1514.88	1532.78	0.988325	1089.88	1786.19	0.610169	1515.45	1355.48	1.11802	2245.58	2218.99	1.01198	6177.01	5777.29	1.06919	2315.06	1203.56	1.92351
21	1969.19	5320.91	0.370085	2775.91	962.402	2.88435	1725.56	2279.42	0.757017	968.781	2522.87	0.384	1691.67	2164.83	0.781432	2859.37	6263.93	0.456482	3635.22	2871.53	1.26595	3653.11	2406.03	1.51831
22	1603.78	1897.11	0.845383	5274.58	1355.8	3.89037	1926.21	1704.22	1.13026	1402.71	1715.55	0.817647	1453.78	1702.1	0.854106	2525.03	2479.16	1.0185	6795.21	15543.7	0.437168	2979.56	1802.41	1.6531
23	3910.34	4319.8	0.905214	4137.2	1412.88	2.92821	1655.34	1704.85	0.970956	2099.03	3542.11	0.592593	1453.78	1049.84	1.38475	2388.63	4375.98	0.545851	6808.3	8042.69	0.84652	4458.63	3214.5	1.38704
24	2323.58	2467.74	0.941582	3281.8	1165.56	2.81564	1655.34	1897.75	0.872263	1443.08	1392.62	1.03623	1215.89	3358.71	0.36201	3471.5	3970.72	0.874275	5981.68	5701.27	1.04918	3065.3	2089.77	1.46682
25	3564.96	3655.06	0.975349	3224.93	1375.55	2.34447	1384.46	2046.37	0.676544	1554.09	1291.71	1.20312	1248.42	944.195	1.32221	2648.12	5171.04	0.512106	4408.48	3697.65	1.19224	4430.18	2668.8	1.65999
26	1603.78	1922.4	0.834262	2855.29	708.688	4.02897	1788.13	1437.56	1.24386	1463.26	1241.25	1.17886	1778.41	2217.1	0.802132	2931.99	5554.13	0.527894	4109.95	5974.13	0.687958	4130.18	2465.49	1.6752
27	2064.29	3834.26	0.538381	1900.36	636.495	2.98567	2942.96	2270.98	1.2959	1069.7	1967.84	0.54359	2025.74	2654.02	0.763272	1439.89	1719.55	0.837364	3016.51	2395.79	1.25909	3031.36	2164.82	1.40029
28	2642.94	4355.84	0.606757	3715.43	1834.17	2.02567	1167.25	1081.59	1.0792	1523.81	1665.09	0.915152	2261.29	1753.68	1.28945	1310.74	3120.9	0.419988	3763.59	4613.88	0.815712	3782.12	2562.42	1.476
29	2490.77	2602.89	0.956923	3909.73	1337.04	2.92416	1862.63	2364.19	0.787852	1735.73	1695.37	1.02381	1943.3	3799.47	0.511465	1386.77	2595.49	0.534299	486.307	1103	0.440895	977.401	678.773	1.43995
30	3327.7	2857.17	1.16468	4140.76	1260.56	3.28486	2967.8	2782.21	1.0667	1937.56	1856.83	1.04348	1943.3	3927.48	0.494795	1316.24	3543.09	0.371494	1515.3	2390.76	0.633818	3045.52	1243.7	2.44877
31				1834.02	726.159	2.52564	2260	2168.65	1.04212	1665.09	1776.1	0.9375	1625.3	1242.91	1.30766	1699.55	1330.01	1.27785	1196.13	868.406	1.37739	2404.04	1714.33	1.40232
32				2330.43	585.048	3.98332	2545.6	2682.46	0.948981	1665.09	1130.24	1.47321	2045.54	4550.29	0.44954	2201.91	6066.16	0.362983				3886.02	3201.94	1.21365
33				1898	504.064	3.76539				1392.62	1665.09	0.836364	3034.66	5513.9	0.550366	1842.89	5147.84	0.357993				2309.13	1052.85	2.19321
34																						3542.79	2583.16	1.37149
35																						1593.81	1198.35	1.33
																						2051.45	1456.4	1.40858
NF-ATc1 N/C Splenic T cells
	WT						Prkcq-/-						Prkcq-/- +GFP-RanGAP1AA						Prkcq-/- +GFP-RanGAP1EE
	US			CD3/CD28			US			CD3/CD28			US			CD3/CD28			US			CD3/CD28
	nuclei	cytosol	ratio	nuclei	cytosol	ratio	nuclei	cytosol	ratio	nuclei	cytosol	ratio	nuclei	cytosol	ratio	nuclei	cytosol	ratio	nuclei	cytosol	ratio	nuclei	cytosol	ratio
1	3523.52	5887.63	0.598462	4666.06	2322.61	2.00897	1509.71	4813.6	0.313634	1386.61	1993.88	0.695431	1394.49	897.375	1.55397	1293.17	2751.87	0.469925	4375.09	4662.88	0.938282	2062.35	5147.28	0.400668
2	2584.31	3374.3	0.765881	3422.3	1030.34	3.32152	1127.25	2585.17	0.436045	1133.58	2358.24	0.480687	1505.35	1801.48	0.835617	3311.55	4172.28	0.793702	3191.77	2510.55	1.27134	4507.03	4696.17	0.959724
3	5597.29	6100.88	0.917455	7412.26	2929.09	2.53056	1549.97	3285.38	0.471778	3622.89	6271.61	0.577665	1334.4	1824.48	0.731388	1626.29	1936.65	0.839744	2135.22	2478.35	0.861551	1145.97	2402.2	0.477053
4	4569.78	6662.5	0.685896	6051.58	1597.43	3.78832	1660.68	2025.15	0.820028	1153.82	2601.15	0.44358	1291.92	1647.42	0.784212	1480.42	2163.22	0.684362	2502.5	5990.09	0.417773	1992.56	3909.26	0.509702
5	1572.13	2964.92	0.530242	2081.9	633.967	3.28392	1268.16	1836.06	0.690695	1518.18	1781.33	0.852273	1473.78	3666.34	0.401976	1566.29	2540.82	0.61645	1638.14	4465.65	0.366832	1327.02	1535.38	0.864295
6	6762.36	8265.09	0.818183	8955.11	3227.52	2.77461	1519.77	4082.18	0.372295	1133.58	1842.06	0.615385	2438.47	3611.58	0.675182	1486.63	1766.99	0.841335	3637.63	12735.2	0.285636	1922.77	3263.95	0.589092
7	3168.9	9151.71	0.346263	4196.44	1403.27	2.99048	4330.35	8359.3	0.518028	1558.67	2115.33	0.736842	6488.54	10335.5	0.627792	1183.51	2335.98	0.506643	1791.09	6377.49	0.280846	1470.65	2902.87	0.50662
8	6384.67	9266.08	0.689037	8454.96	3039.85	2.78137	1348.67	1819.18	0.741365	1670	1508.06	1.10738	3893.74	12679.2	0.307097	1392.49	2774.63	0.501864	1210.5	1335.27	0.906556	907.272	3689.78	0.245888
9	3471.87	7318.67	0.474386	6023.74	1921.69	3.1346	1601.79	5068.39	0.316035	1275.27	1771.21	0.72	1280.43	5546.08	0.230871	1503.18	1679.05	0.895256	1226.6	2447.15	0.501234	2317.24	1219.81	1.89967
10	2061.58	5373.65	0.383647	9332.38	4226.43	2.2081	1551.1	3548.4	0.437127	1528.3	2277.27	0.671111	1658.9	5711.96	0.290426	1332.48	2185.97	0.60956	1367.47	2460.24	0.555828	2257.56	3190.12	0.707673
11	3753.51	5875.29	0.638864	10477.5	4410.25	2.37571	1419.31	1525.79	0.930213	4354.65	5120.83	0.85038	1388.42	2604.14	0.533157	1290.07	2569.79	0.502013	2502.5	2900.96	0.862643	1828.7	4286.53	0.426616
12	3752.51	3816.99	0.983107	6965.81	2104.58	3.30984	1946.48	4020.05	0.484193	1356.24	2257.03	0.600897	2071.27	5056.11	0.409656	10087.8	8482.16	1.18929	1391.62	1849.45	0.752448	4809.25	7014.92	0.685574
13	3784.51	6650	0.5691	10782.9	3700.34	2.91403	1399.03	1258.62	1.11156	1670	1660.33	1.00582	1733.55	6721.85	0.257897	1502.15	2341.16	0.641626	1259.8	2807.39	0.448746	2583.25	6576.46	0.392802
14	3686.55	3554.71	1.03709	9342.17	3598.44	2.59617	942.826	2040.83	0.461982	1497.94	2914.91	0.513889	2207.38	2972.93	0.742494	935.221	2275.98	0.410909	4280.61	11978.7	0.35735	454.142	1566.74	0.289864
15	502.658	1951.08	0.257631	10347	3536.6	2.92568	1905.93	5528.77	0.344729	1376.48	2257.03	0.609865	1949.28	5224.12	0.37313	752.108	3499.84	0.214898	2057.74	4982.86	0.412964	434.924	366.145	1.18785
16	2237.27	3829.37	0.584239	9782.3	4484.4	2.18141	1443.8	2844.31	0.507608	1508.06	2004	0.752525	1843.98	2914.44	0.632705	1105.92	2545.99	0.434376	2071.83	2151.32	0.96305	1847.92	1267.35	1.4581
17	2367.71	3411.38	0.694061	8879.92	2884.06	3.07897	1180.33	904.919	1.30435	1052.61	1852.18	0.568306	179.775	328.519	0.547229	2299.77	1853.89	1.24051	1346.34	2190.57	0.614607	5908.9	4244.05	1.39228
18	1125.94	1642.77	0.685392	6276.17	2942.29	2.13309	1414.52	1477.66	0.957272	1710.48	1963.51	0.871134	2679.93	2967.85	0.902987	1330.41	2162.18	0.615311	2129.19	4933.55	0.431573	1813.53	2762.27	0.656536
19	1744.38	1816.01	0.960554	10380.3	3719.71	2.79062	1201.41	2952.3	0.40694	1599.15	2914.91	0.548611	2044.3	3498.28	0.584372	1417.31	1851.82	0.765363	1918.88	3474.52	0.552273	1839.83	3015.14	0.610198
20	1958.42	2275.23	0.860754	11087.7	4185.17	2.64929	1580.8	4315.66	0.366294	1548.55	2935.15	0.527586	1099.42	1704.56	0.644987	1651.12	2627.72	0.628346	1354.39	3182.71	0.425545	3170.9	6558.25	0.483498
21	1302.03	4206.9	0.309497	5933.89	2485.84	2.38707	1180.33	3378.16	0.3494	1416.97	2449.33	0.578512	2286.26	5062.62	0.451596	1523.87	3535.01	0.43108	2703.74	4404.27	0.613891	3498.61	6871.8	0.509126
22	2015.5	4852.57	0.415348	2595.8	1037.78	2.50129	1622.95	3506.84	0.462796	1943.27	4129.45	0.470588	1322.6	2638.65	0.50124	1393.52	1060.4	1.31415	3254.15	6848.41	0.475169	1109.56	1206.66	0.919531
23	1746.21	3397.03	0.514039	4275.68	2026.85	2.10952	1738.88	4544.62	0.382624	1396.73	2429.09	0.575	1408.99	3149.61	0.447353	1482.49	2384.61	0.621692	2379.74	4390.19	0.542058	2446.7	3530.98	0.692925
24	1934.02	2216.57	0.872529	4890.09	1521.36	3.21429	1327.87	2113.18	0.628375	941.273	2196.3	0.428571	1641.42	3042.99	0.539409	2452.89	4202.29	0.583703	2717.83	6355.36	0.427644	2005.71	3151.68	0.636393
25	1828.48	1864.93	0.980451	1426.1	581.552	2.45224	1591.34	2044.48	0.778357	1902.79	1568.79	1.2129	1514.92	1690.39	0.896193	6526.89	16023.9	0.407321	2226.79	4882.23	0.456101	2296.26	10047.8	0.228534
26	8299.03	9742.78	0.851813	6972.12	2140.3	3.25754	1393.91	2177.39	0.640174	2998.41	6410.27	0.467751	1385.33	2748.29	0.504071	7833.51	10194.3	0.768419	2035.61	2977.44	0.683677	1964.85	3725.51	0.527403
27	4692.49	7035.33	0.66699	4226.53	1627.02	2.59771	1412.18	2162.13	0.653142	1914.42	6072.68	0.315252	1473.78	4104.54	0.359061	1288	2763.25	0.466118	1292	4670.93	0.276605	1385.69	4551.53	0.304444
28	1940.26	3235.89	0.599605	8515.57	3086.38	2.75908	2208.41	5473.1	0.403503	3097.82	12397	0.249885	2438.47	2331.66	1.04581	1668.71	2042.17	0.817123	3690.86	3630.48	1.01663	1689.12	3075.82	0.549161
29	3605.29	3995.34	0.902374	6174.16	2924.19	2.11141	1804.29	4434.7	0.406857	1999.04	2309.36	0.865626				1396.62	3165.68	0.441176				1449.41	4212.7	0.344058
30	2086.4	5128.78	0.406802	3666.19	1065.36	3.44127	2375.42	3849.93	0.617005							1778.37	1893.2	0.939344				2021.89	3102.12	0.651777
31	4466.36	5623.94	0.794169	6675	2656.8	2.51242										1570.43	1924.24	0.816129				1478.74	1335.12	1.10758
32	488.455	1209.55	0.403833													1485.59	3168.78	0.468821				1864.11	4422.07	0.421546
33	3218.25	3873.27	0.830886													144.835	375.537	0.385675				2697.54	7607.13	0.354607
34	3680.71	3821.68	0.963113													2159.08	1940.79	1.11247				3734.28	2840.16	1.31481
35	268.352	858.348	0.312638													1646.98	1957.34	0.841438
36	1311.96	1973.53	0.664777													181.044	304.154	0.595238
